# Supplementary material for: Design and Synthesis of Potent N-Acylethanolamine-hydrolyzing Acid Amidase (NAAA) Inhibitor as Anti-Inflammatory Compounds
Source: PubMed Central journal article supplement (PMC3423427; doi:10.1371/journal.pone.0043023), 2012-08-20

Figure S3

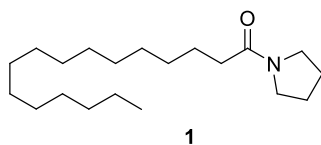

Lyh-C-113-2-1H  
CDCl<sub>3</sub>  
2010.7.10

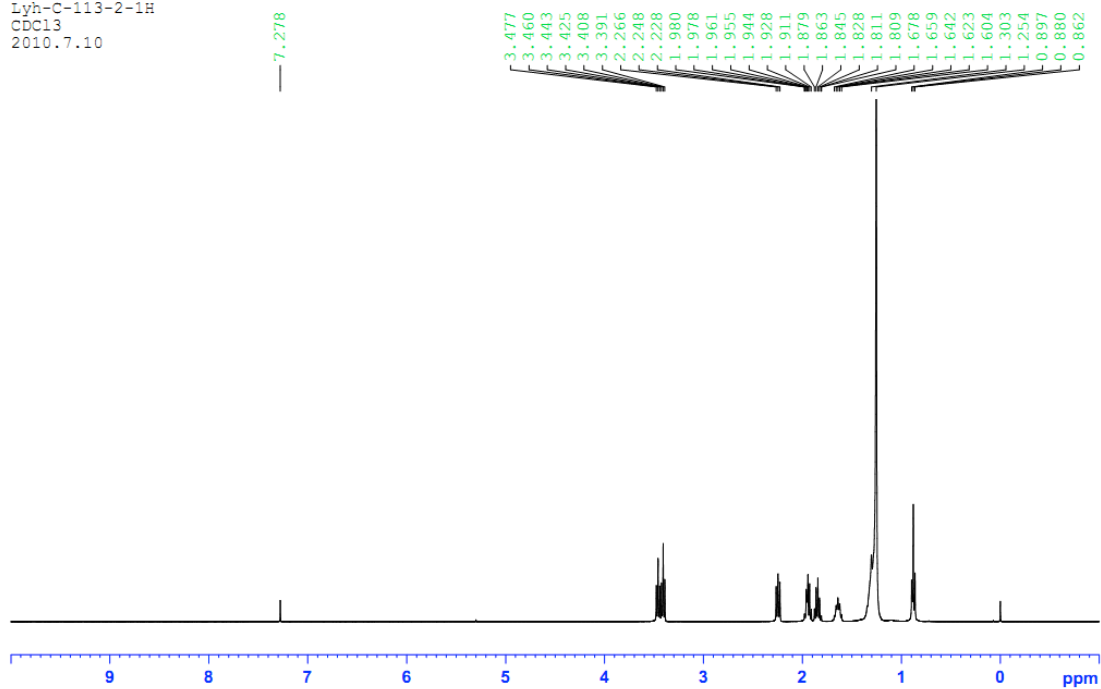

Lyh-C-113-2-13C  
CDCl<sub>3</sub>  
2010.7.10

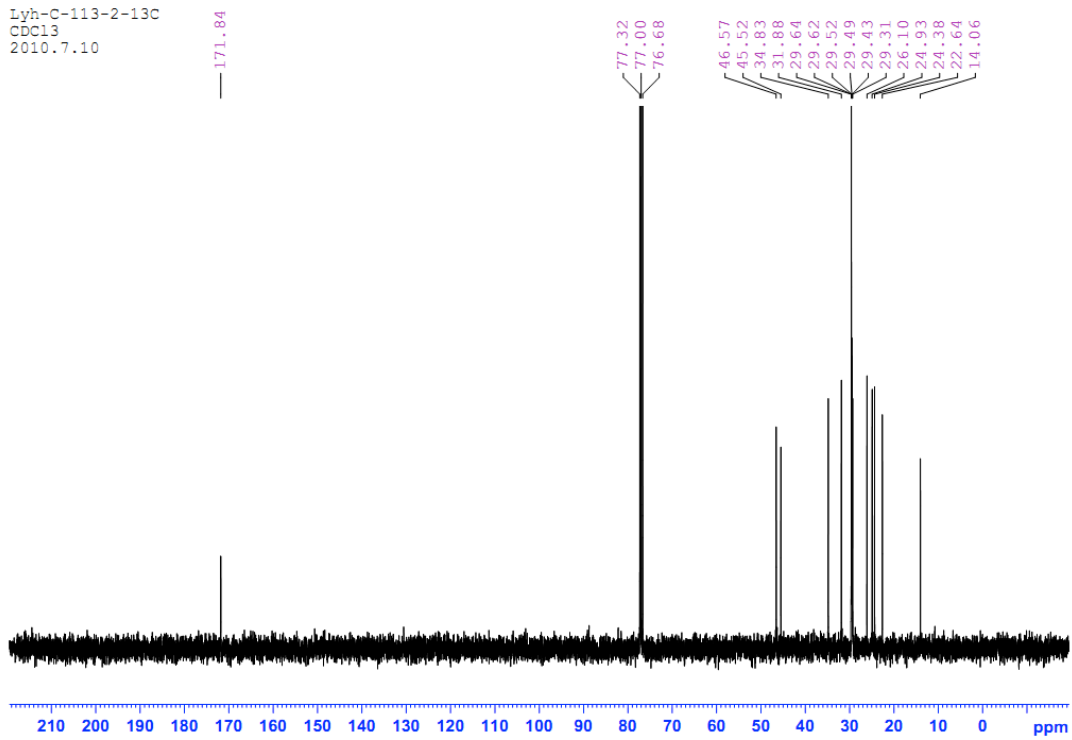

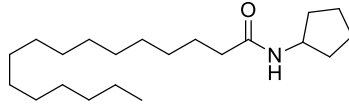

2

Lyh-C-112-1H  
CDCl3  
2010.7.20

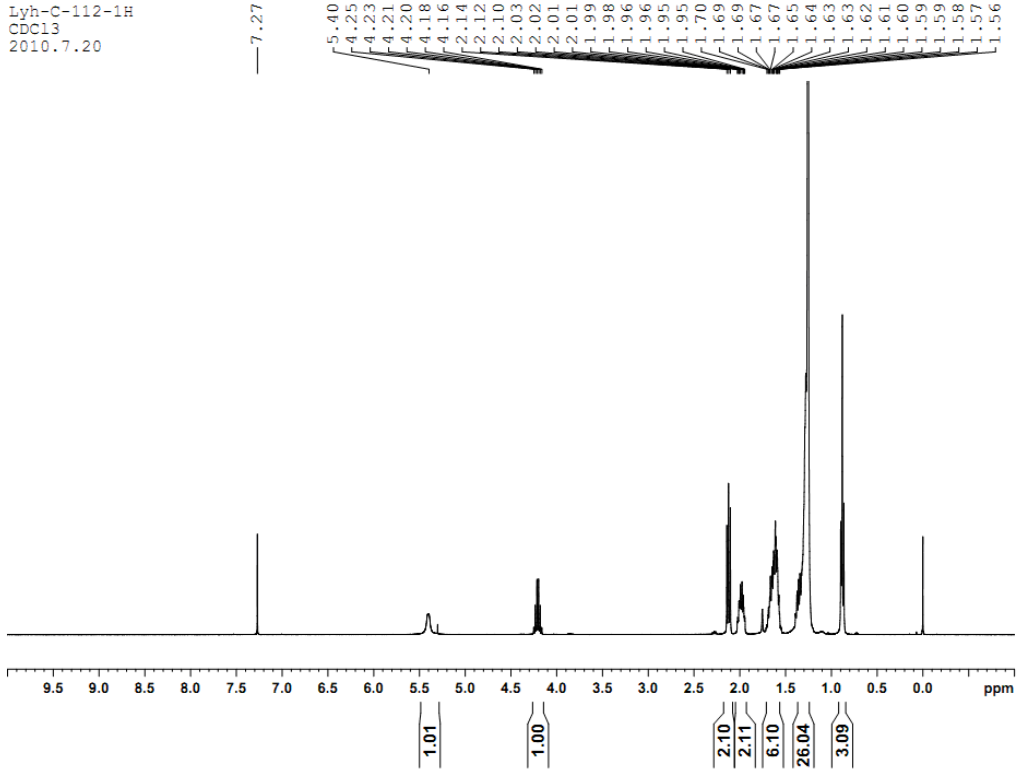

Lyh-C-112-13C  
CDCl3  
2010.7.20

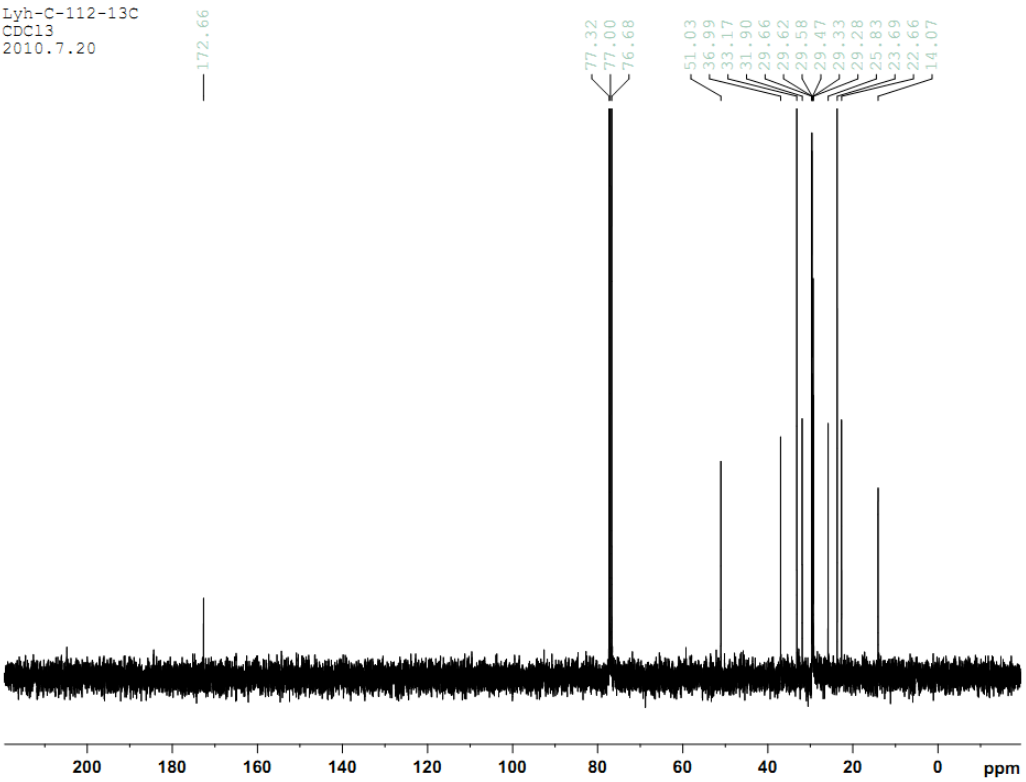

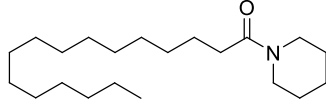

3

Lyh-D56-1H  
CDCl3  
2010.8.03

— 7.303

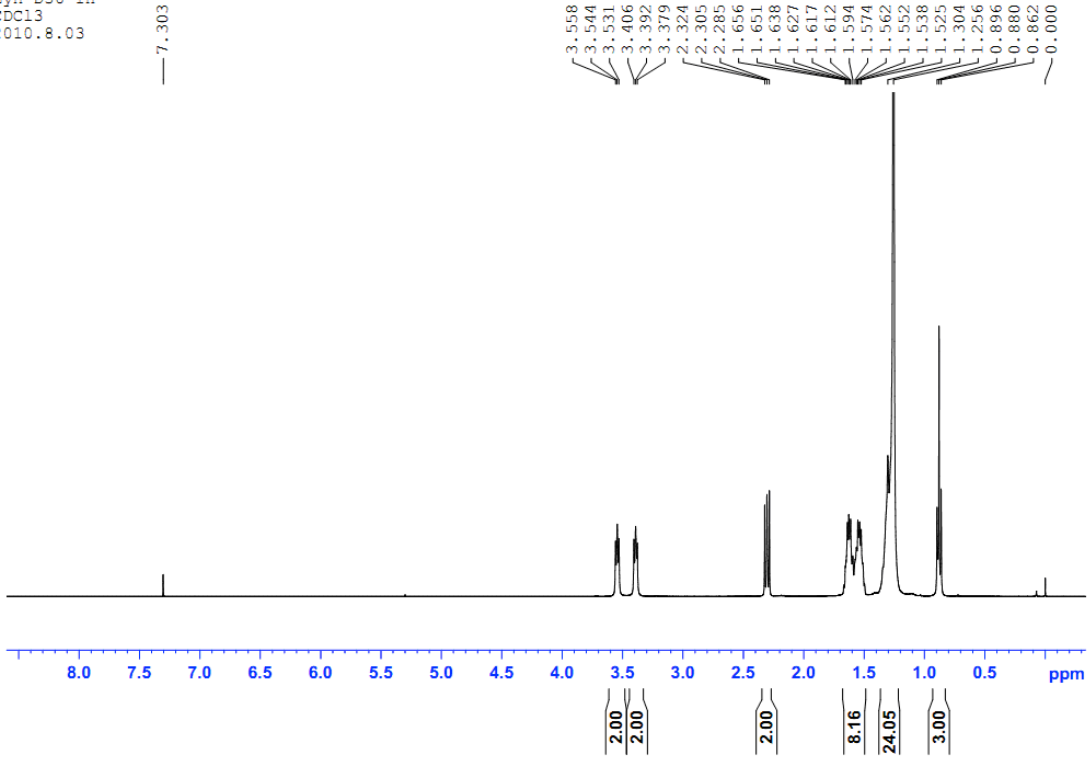

Lyh-D56-13C  
CDCl3  
2010.8.03

— 171.38

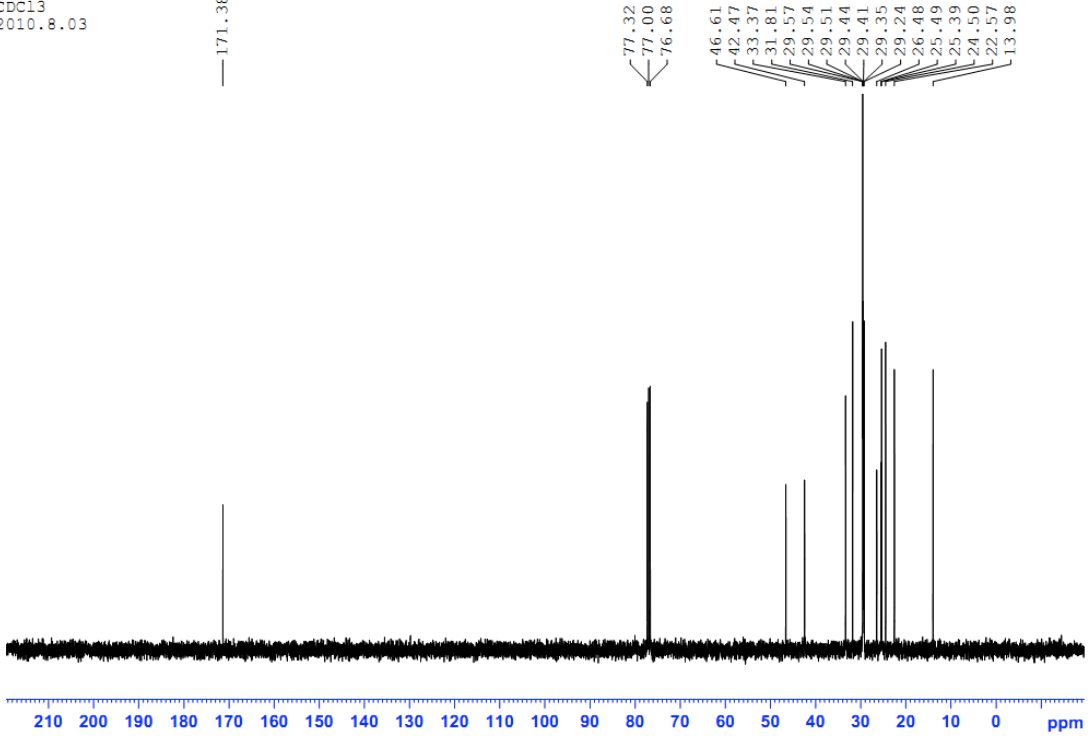

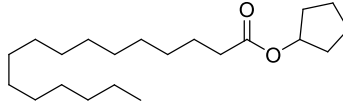

4

Lyh-D-61-1H  
CDCl3  
2010.10.26

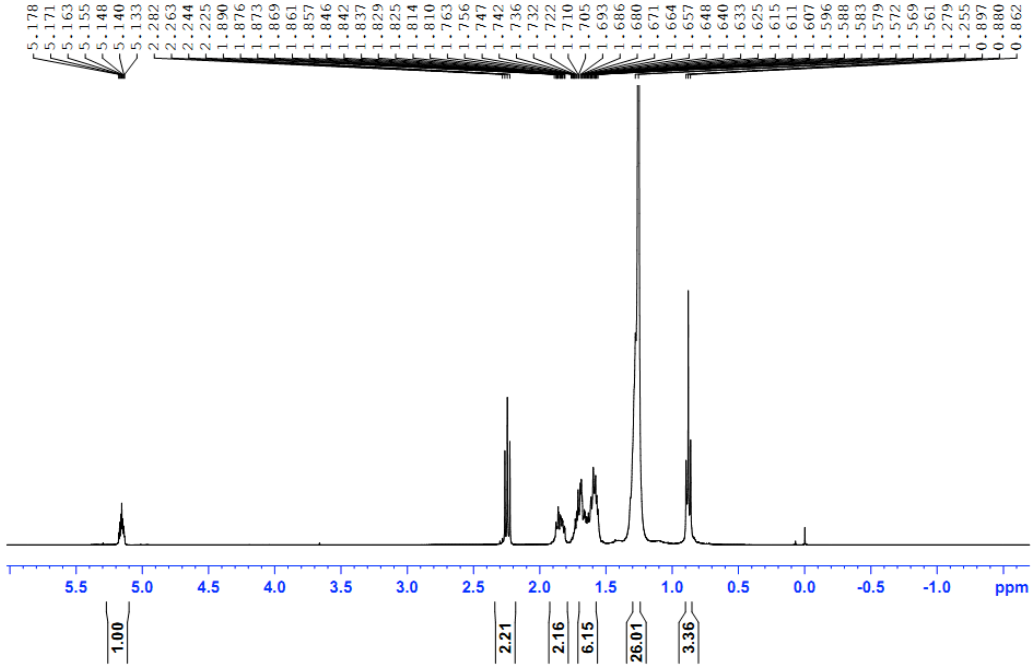

Lyh-D-61-13C  
CDCl3  
2010.10.26

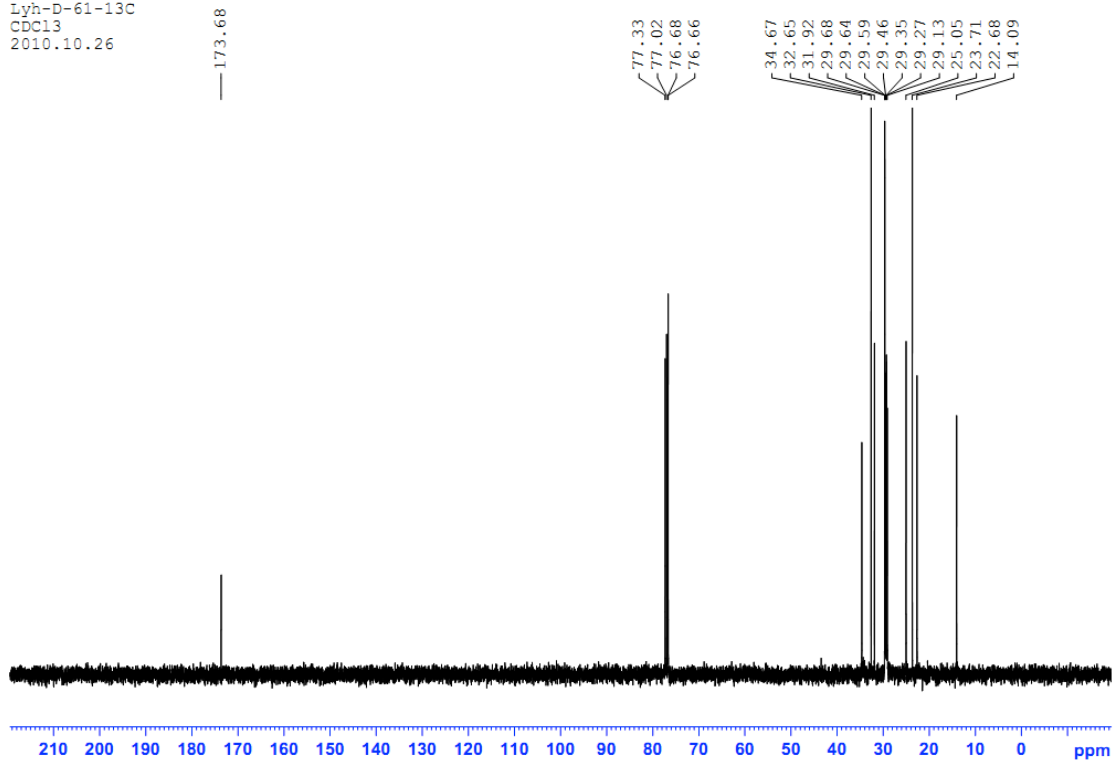

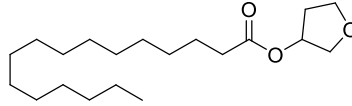

5

Lyh-D63-1H  
 CDC13  
 2010.9.08

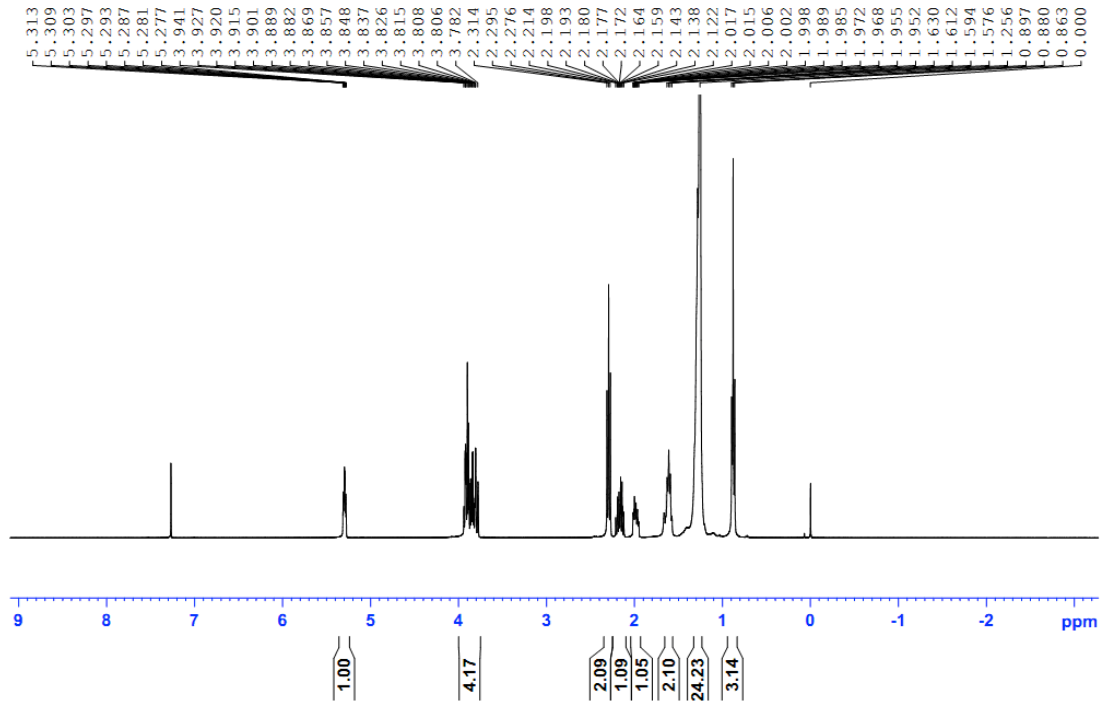

Lyh-D63-13C  
 CDC13  
 2010.9.08

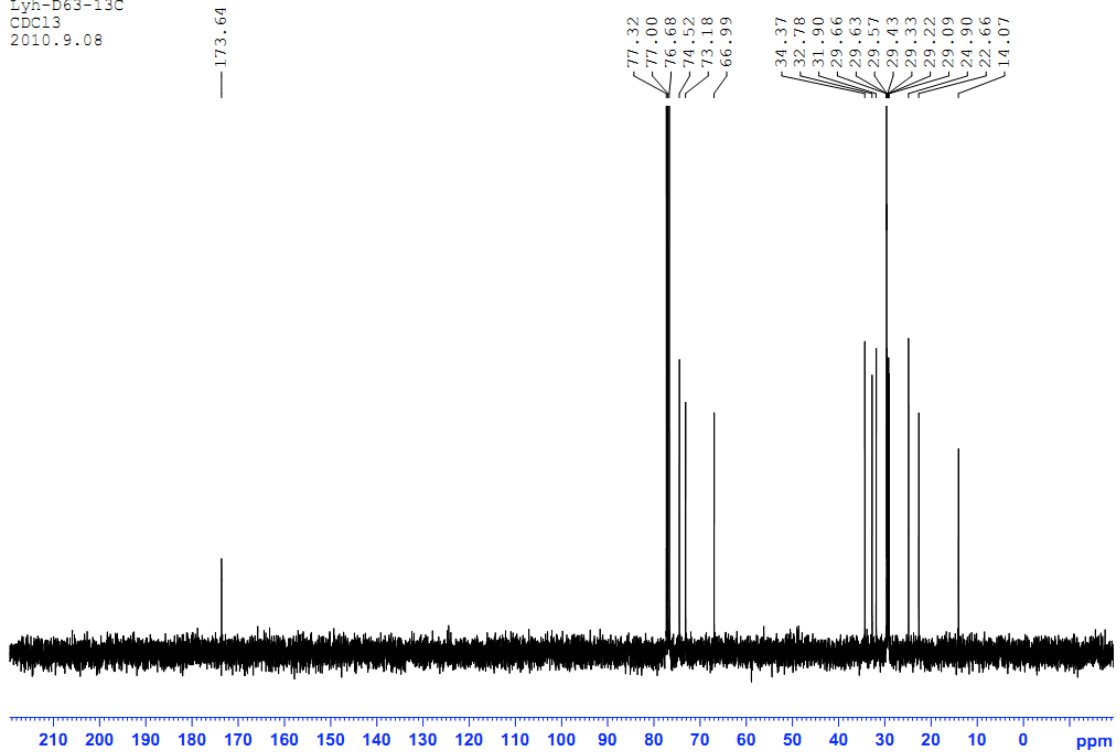

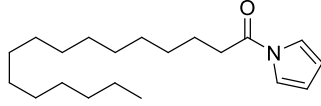

6

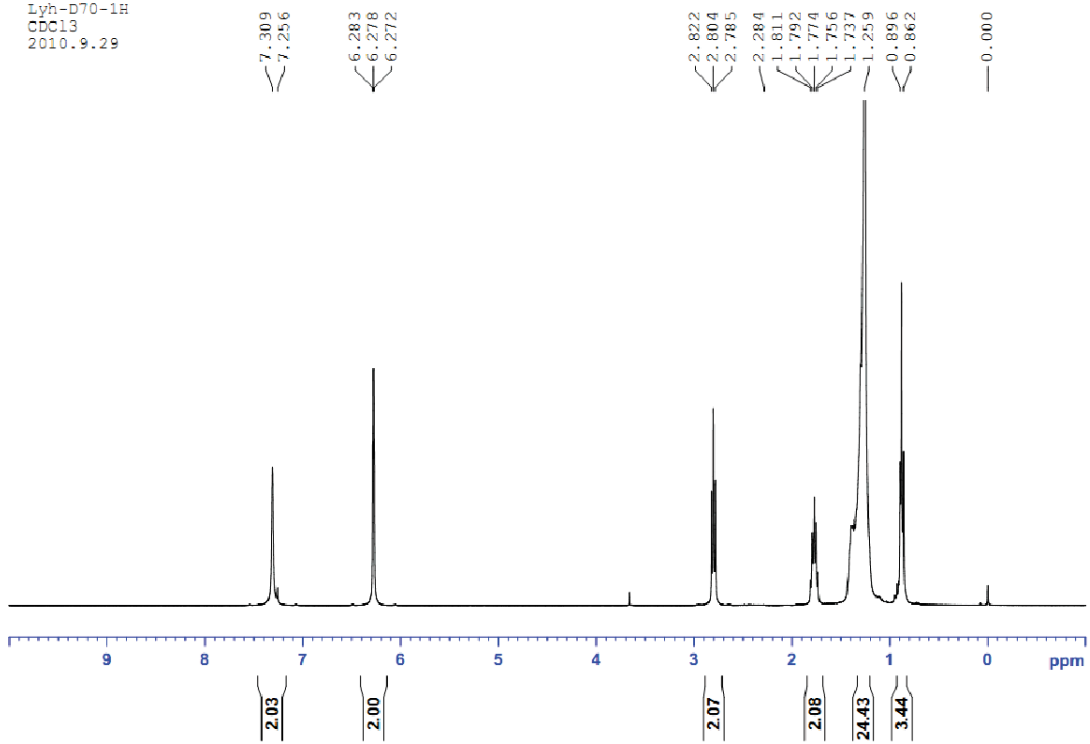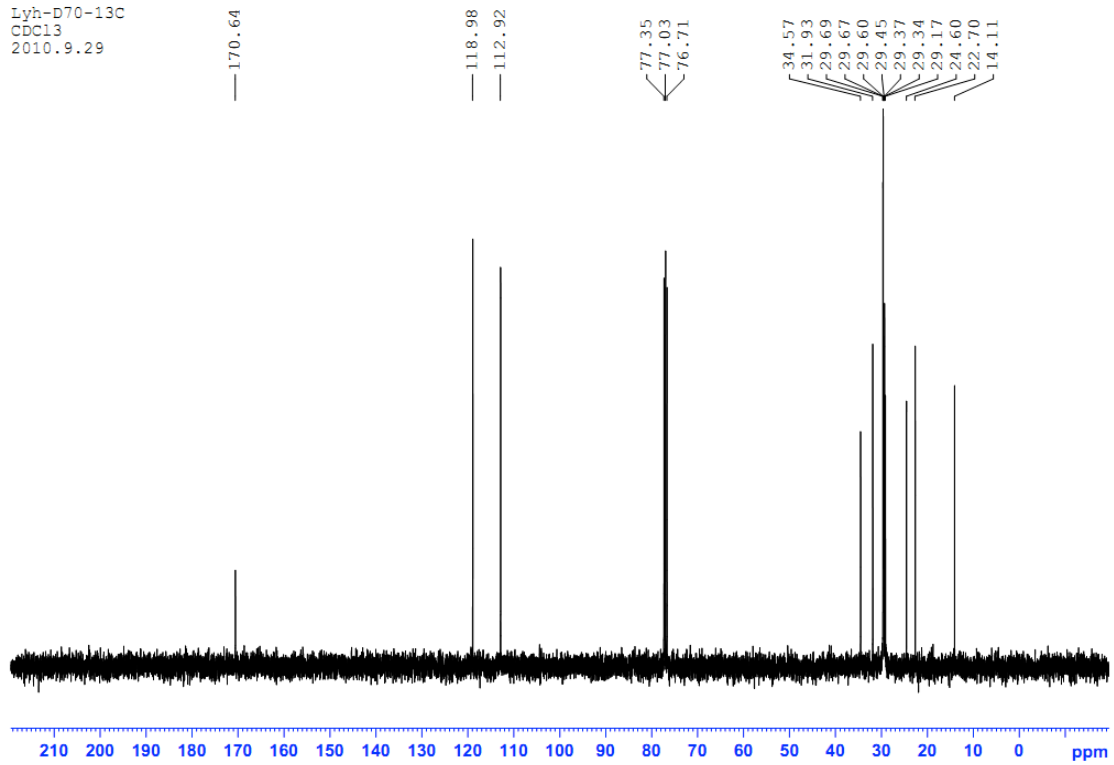

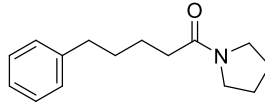

10

Lyh-D-101-1H  
 CDCl3  
 2010.11.18

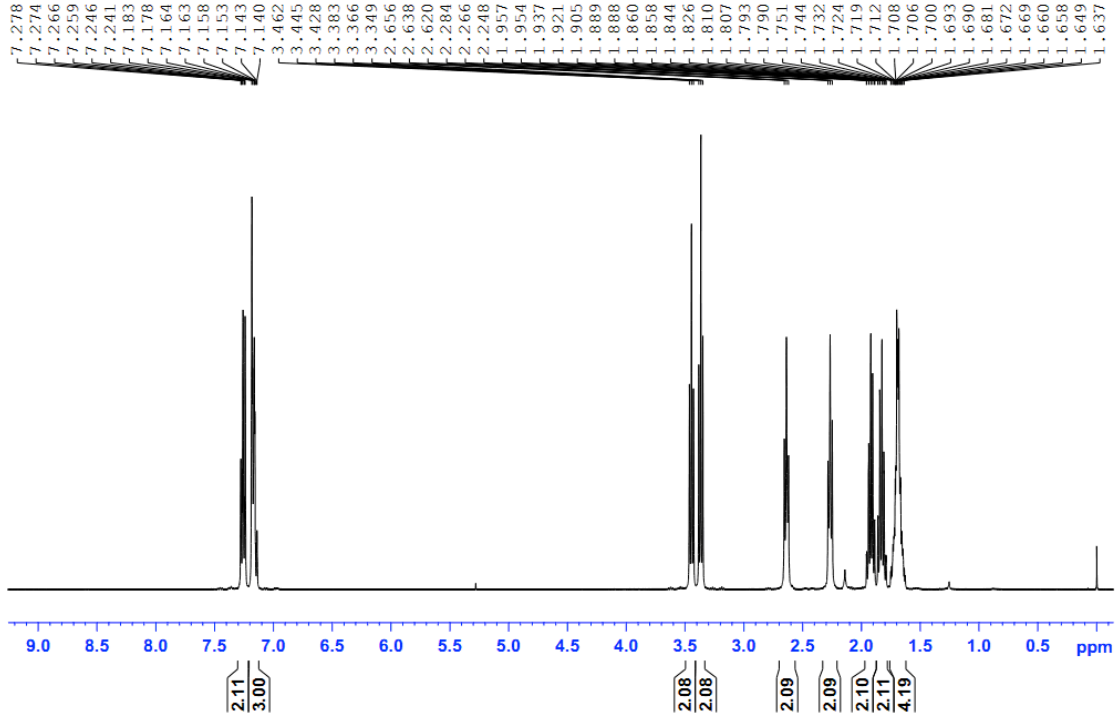

Lyh-D-101-13C  
 CDCl3  
 2010.11.18

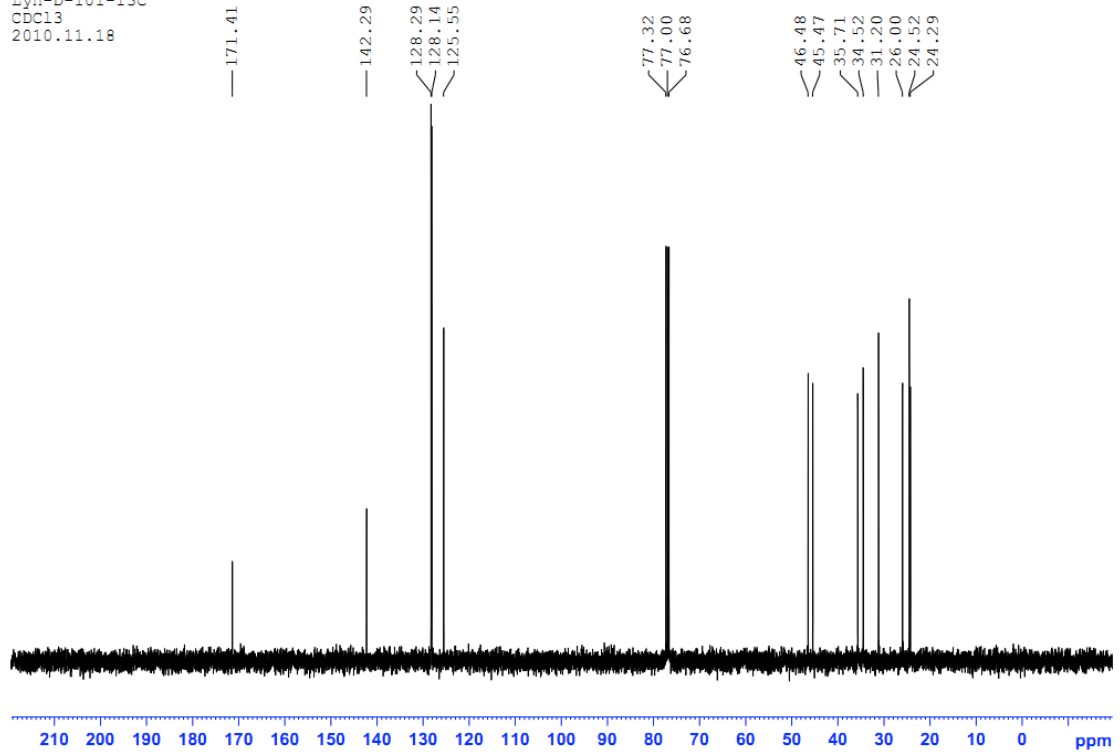

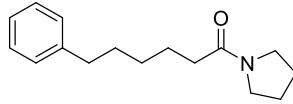

11

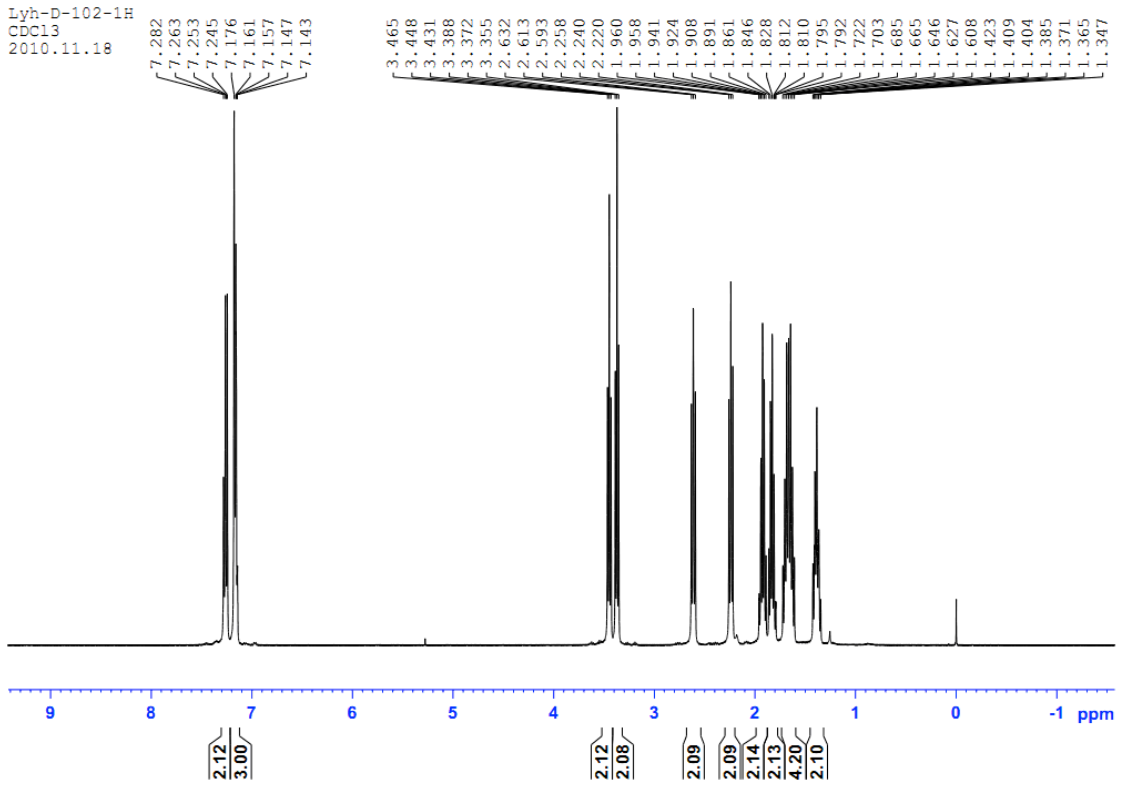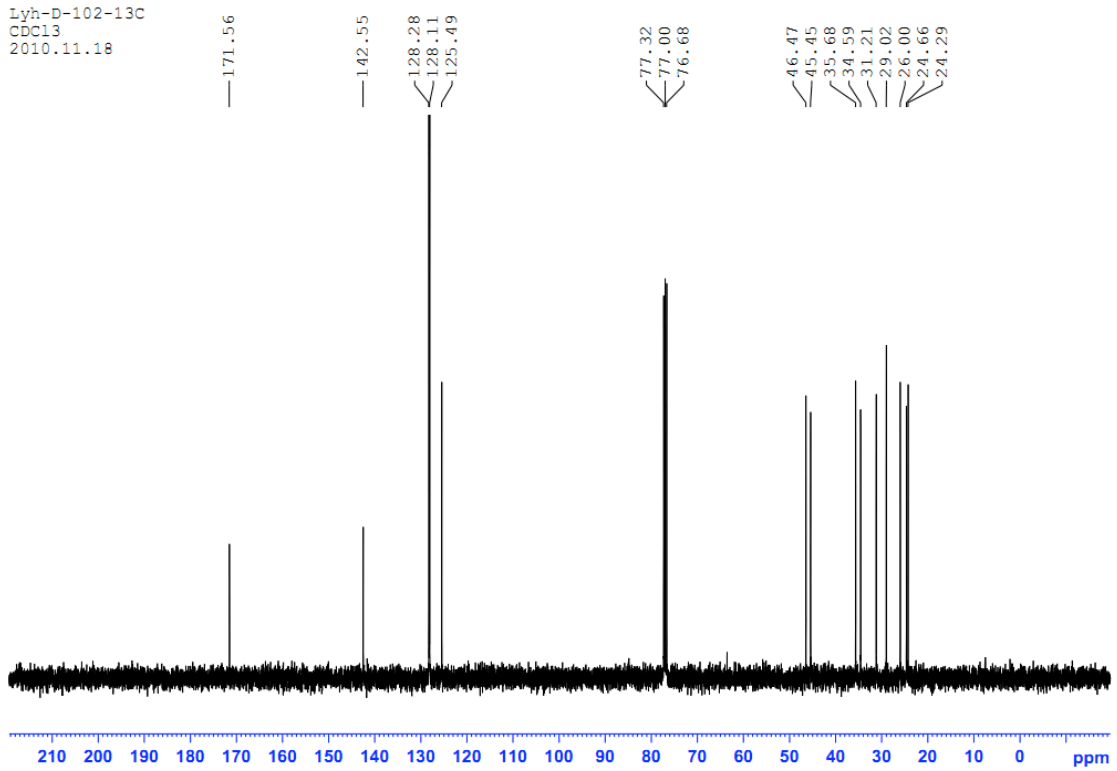



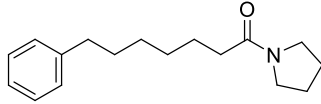

12

Lyh-D-103-1H  
 CDCl3  
 2010.11.17

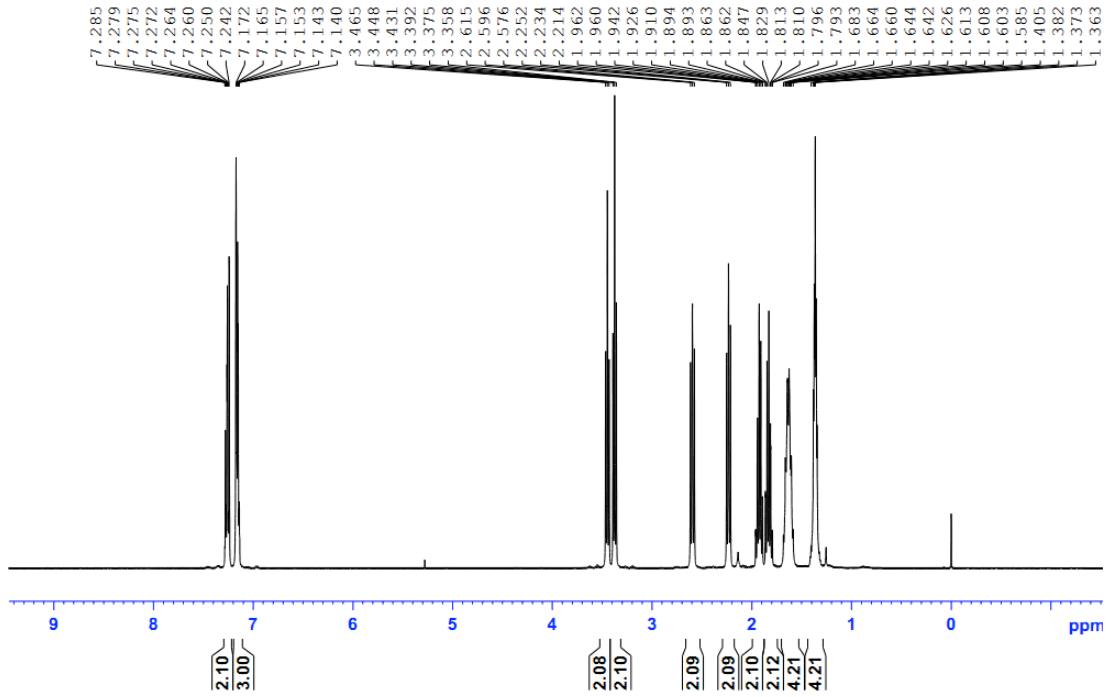

Lyh-D-103-13C  
 CDCl3  
 2010.11.17

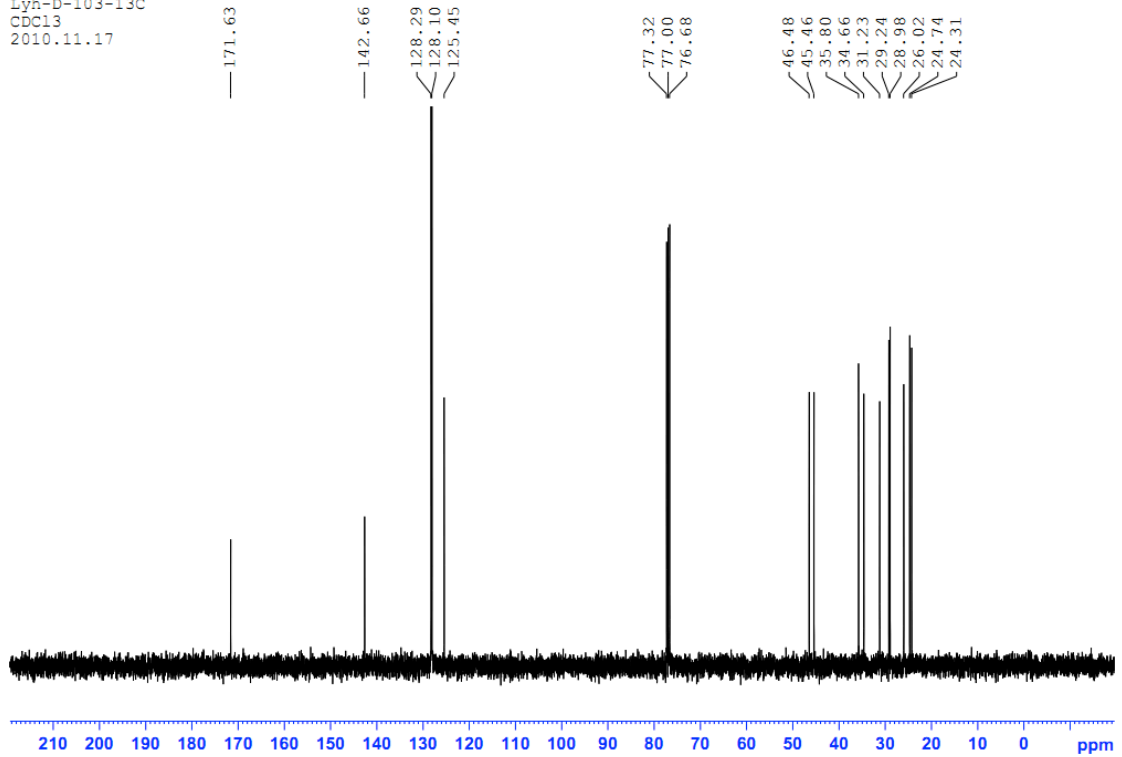

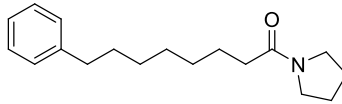

13

Lyh-D-104-1H  
 CDC13  
 2010.11.17

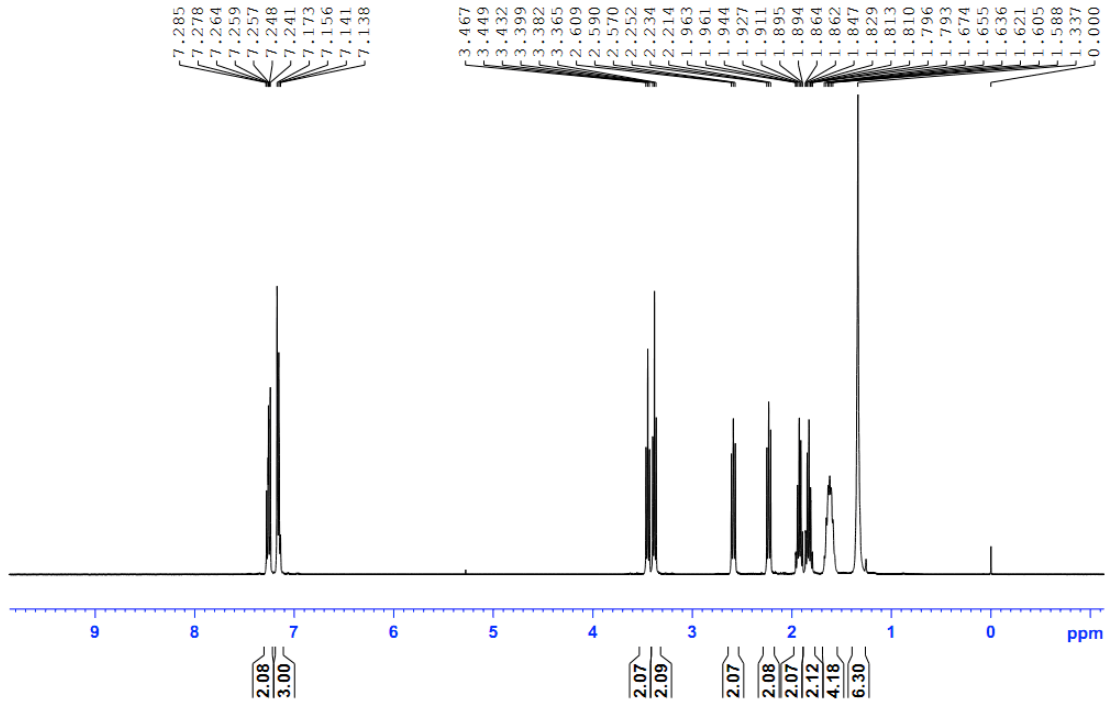

Lyh-D-104-13C  
 CDC13  
 2010.11.17

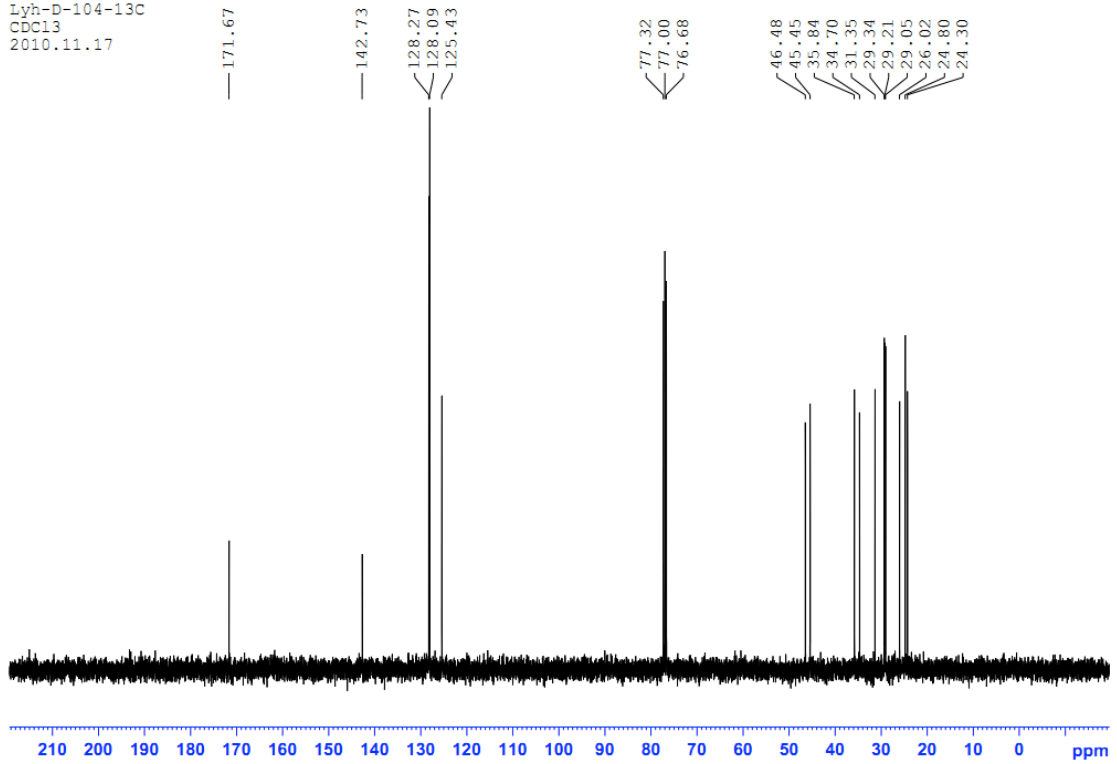

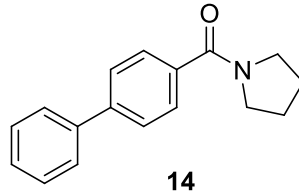

14

Lyh-D-97-1H  
 CDCl<sub>3</sub>  
 2010.11.18

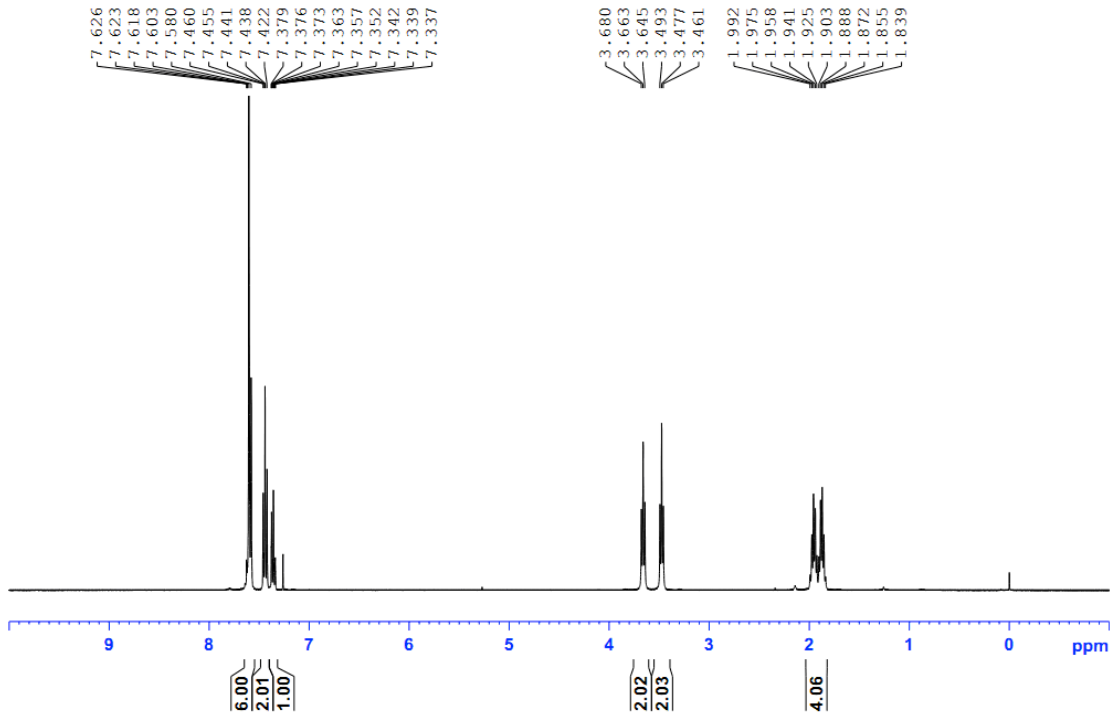

Lyh-D-97-13C  
 CDCl<sub>3</sub>  
 2010.11.18

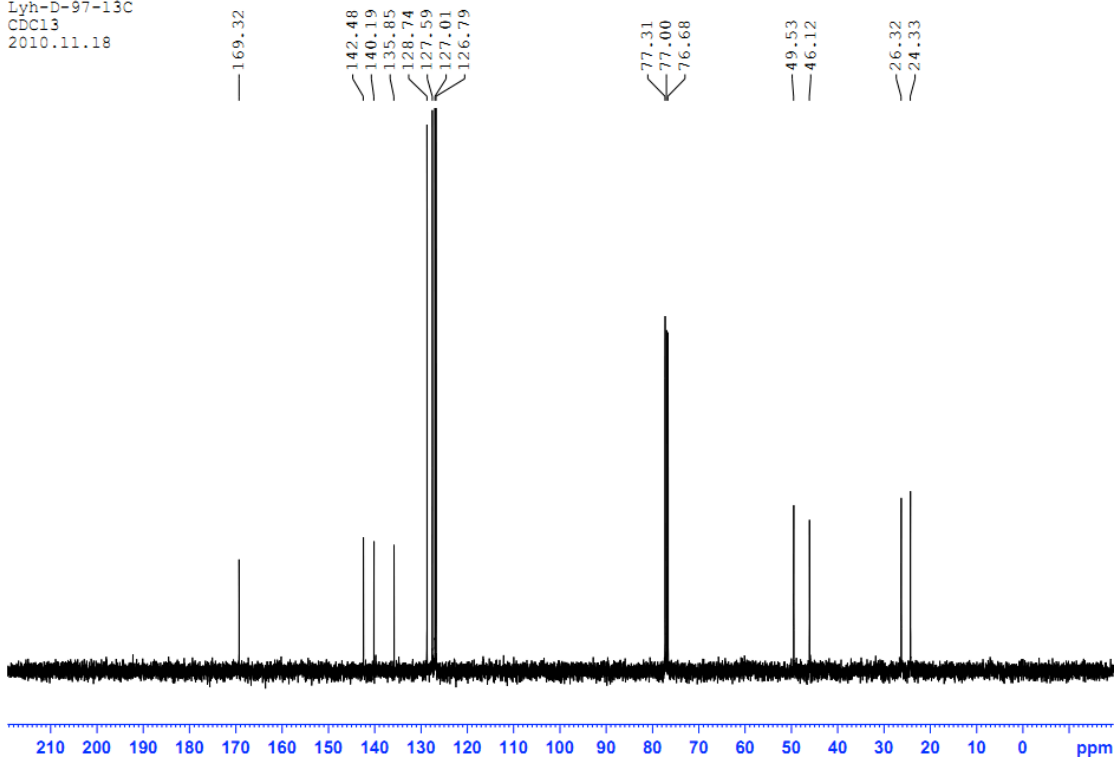

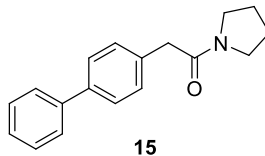

Lyh-E-9-1H  
CDCl<sub>3</sub>  
2010.12.01

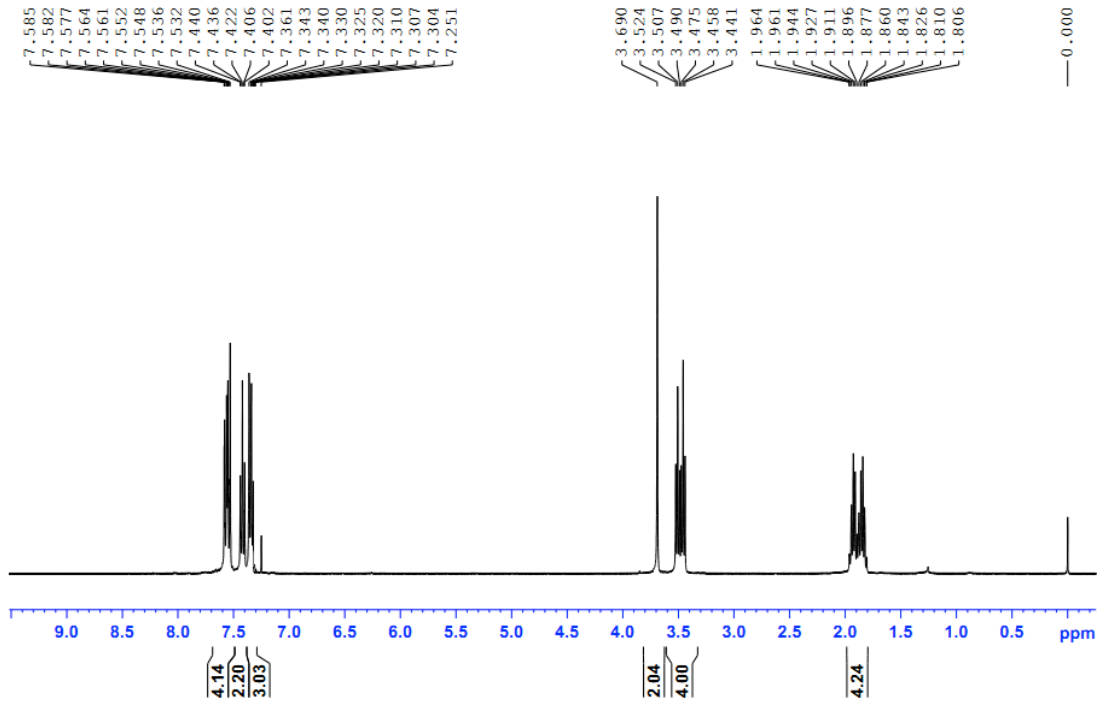

Lyh-E-9-13C  
CDCl<sub>3</sub>  
2010.12.01

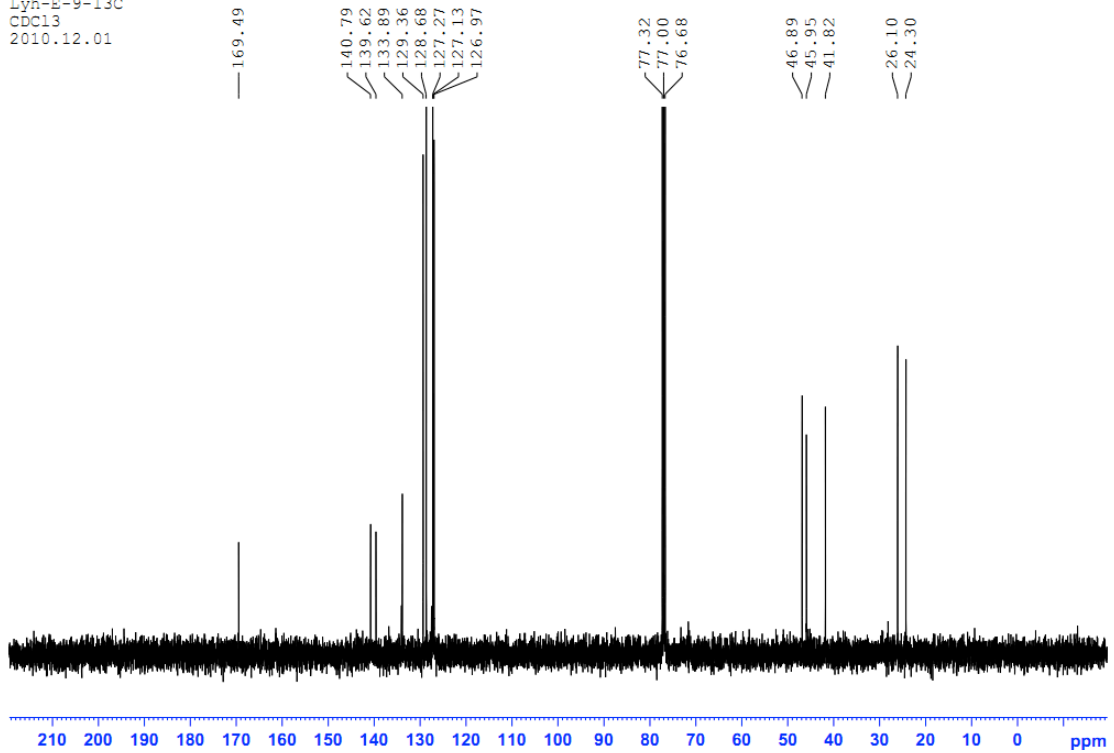

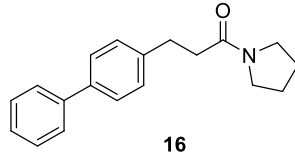

Lyh-E-8-1H  
 CDC13  
 2010.11.29

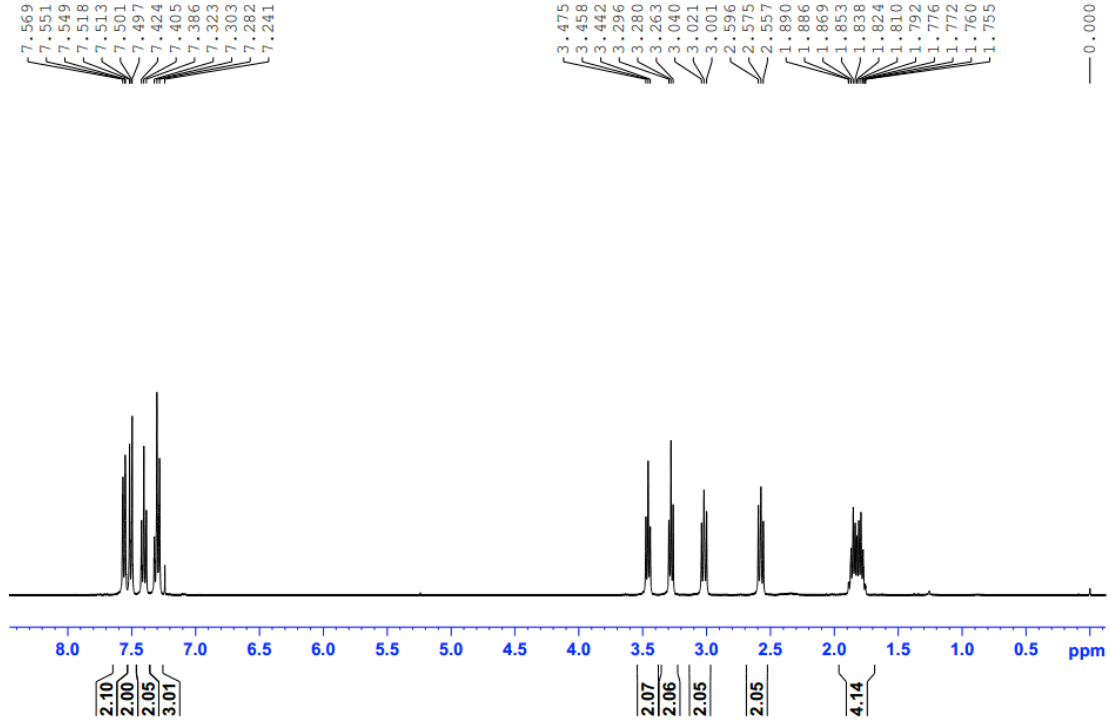

Lyh-E-8-13C  
 CDC13  
 2010.11.29

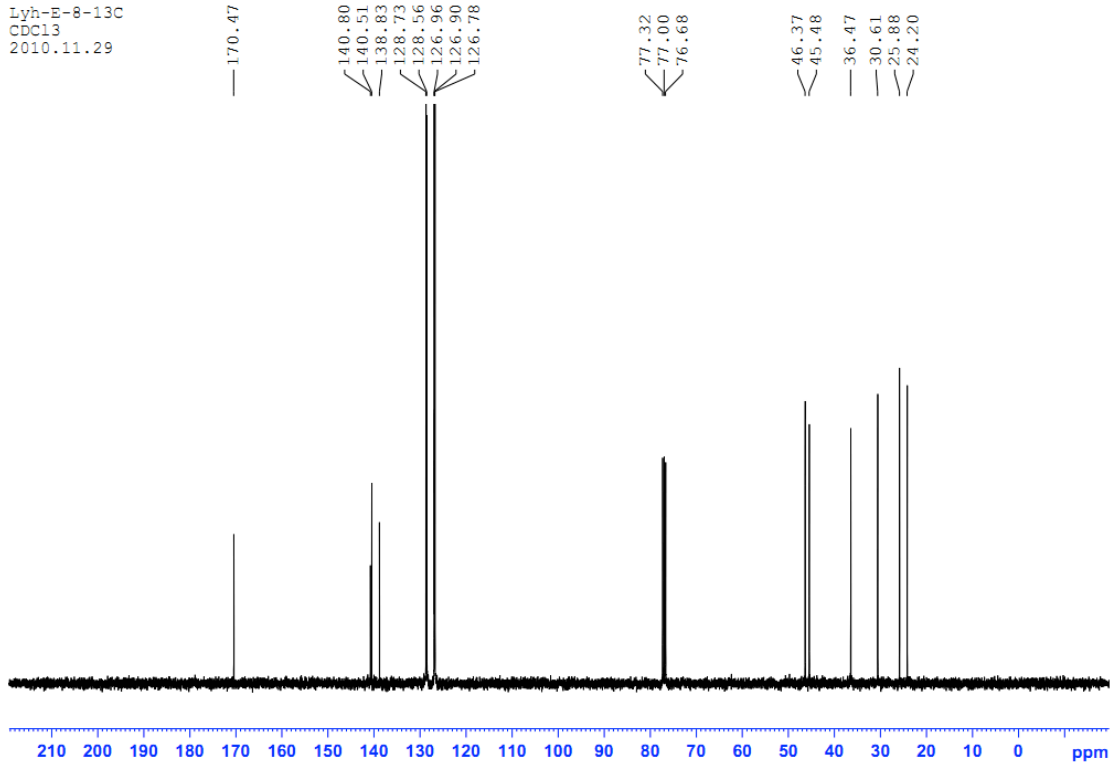

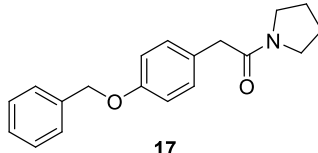

Lyh-E-12-1H  
 CDC13  
 2010.12.05

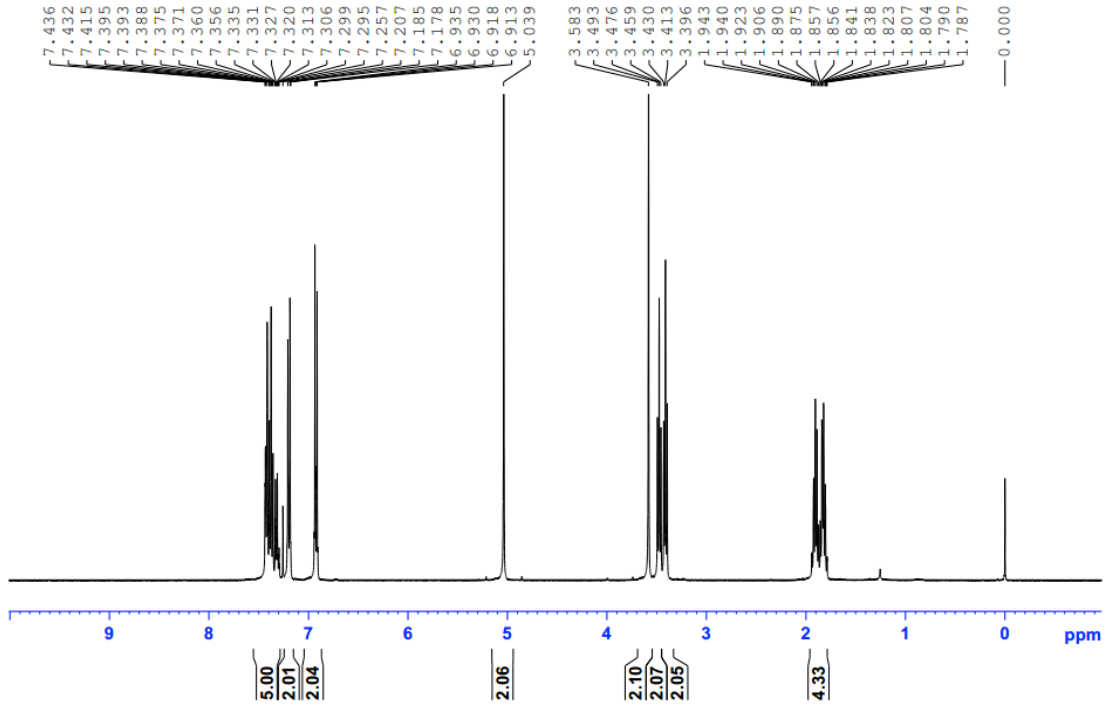

Lyh-E-12-13C  
 CDC13  
 2010.12.01

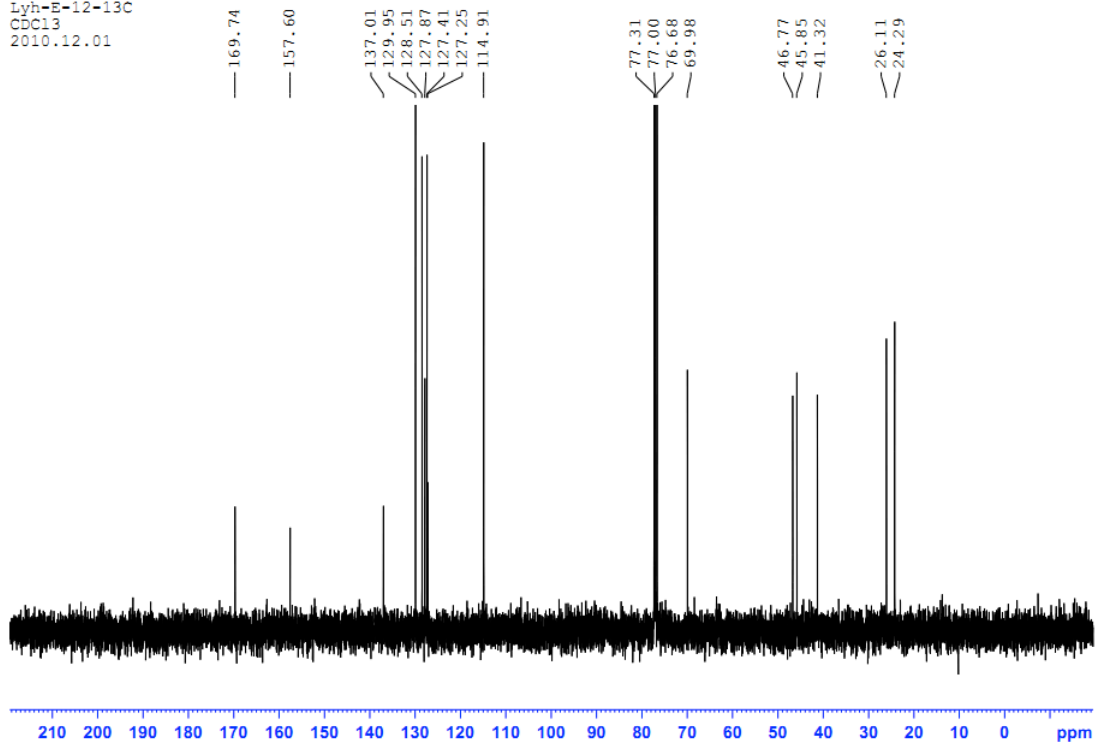

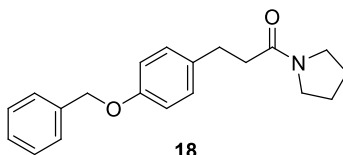

Lyh-E-13-1H  
 CDCl3  
 2010.12.01

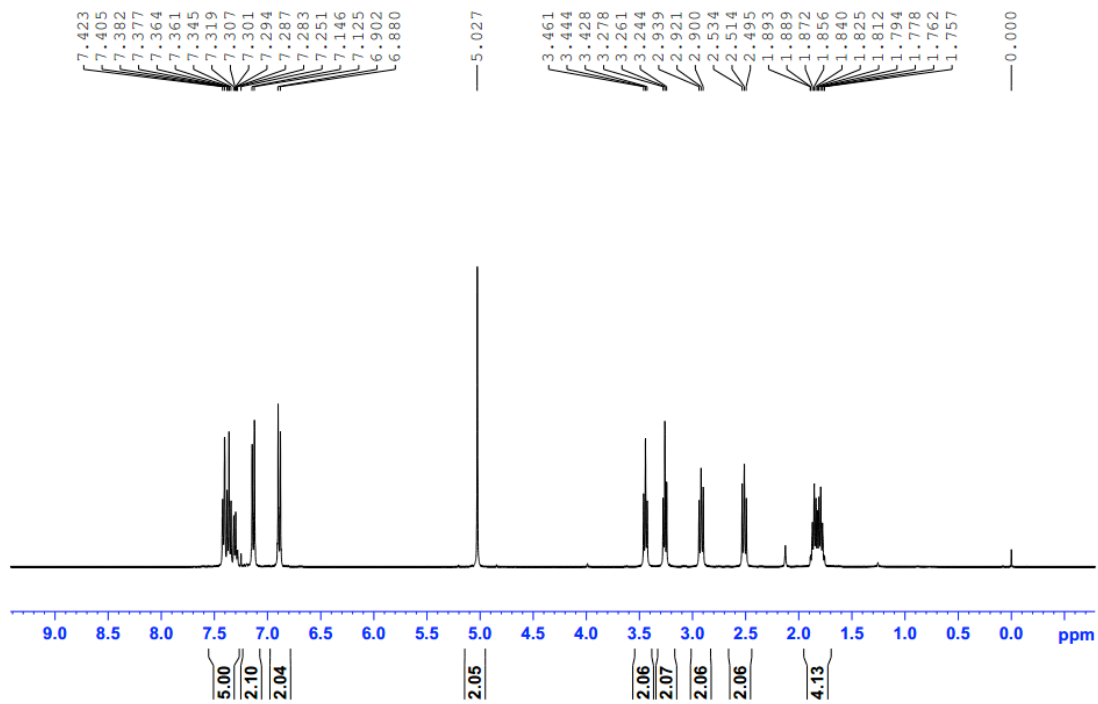

Lyh-E-13-13C  
 CDCl3  
 2010.12.05

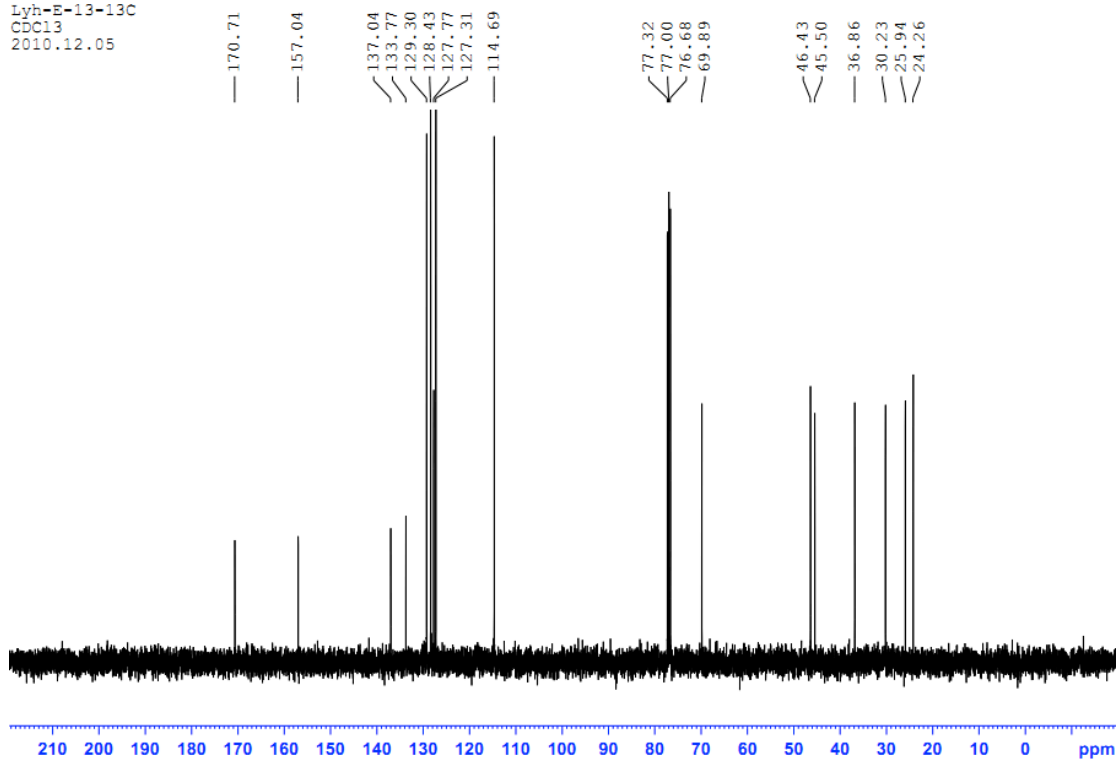

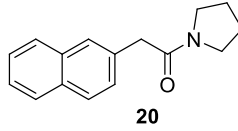

Lyh-D-106-1H  
 CDC13  
 2010.11.29

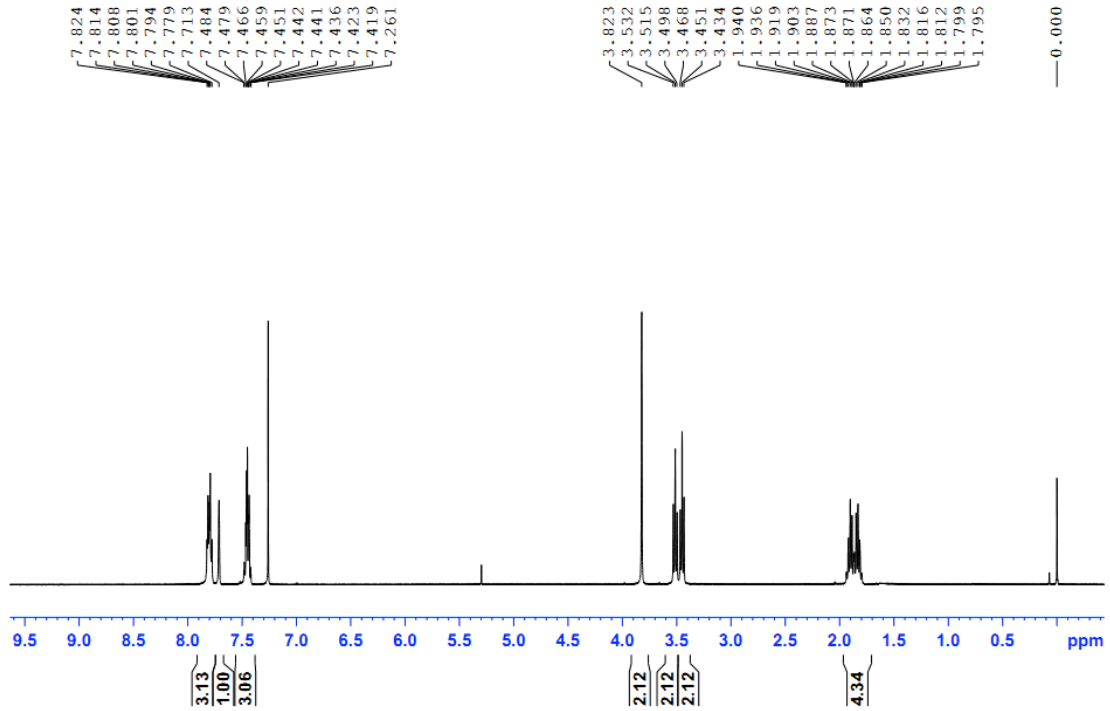

Lyh-D-106-13C  
 CDC13  
 2010.11.29

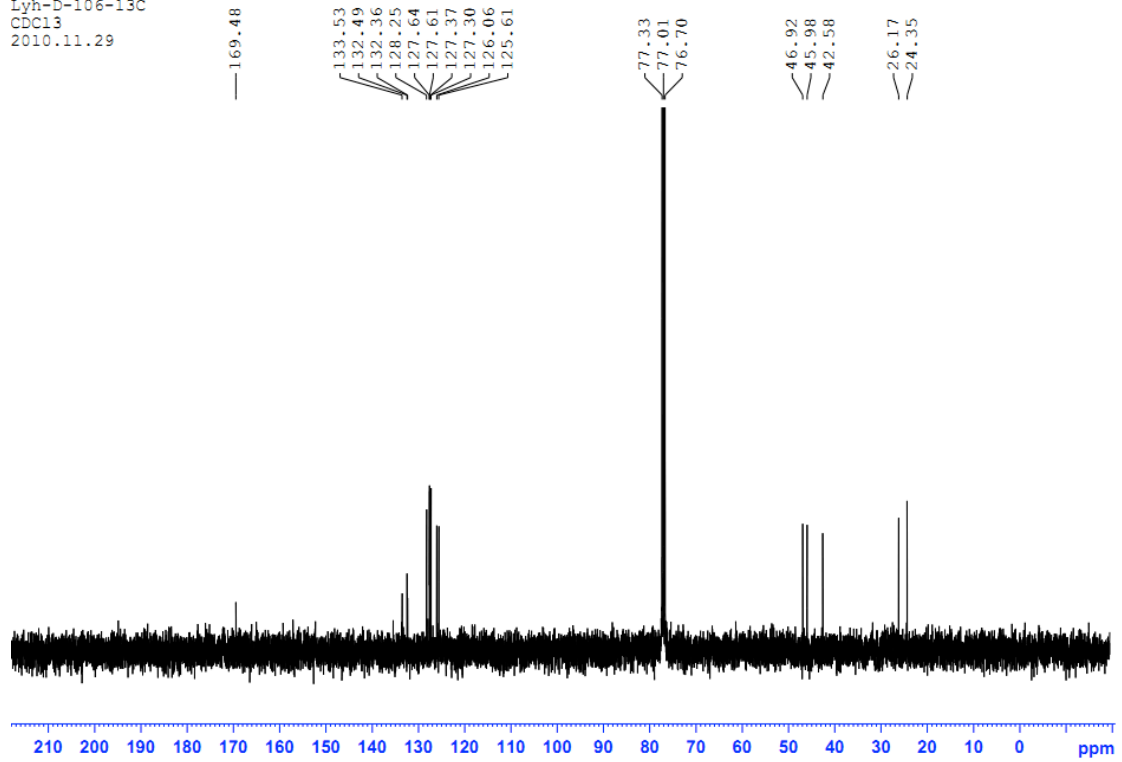



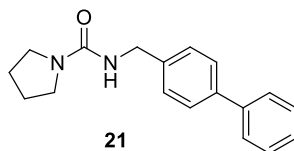

Lyh-E11-1H  
 CDCl<sub>3</sub>  
 2010.12.16

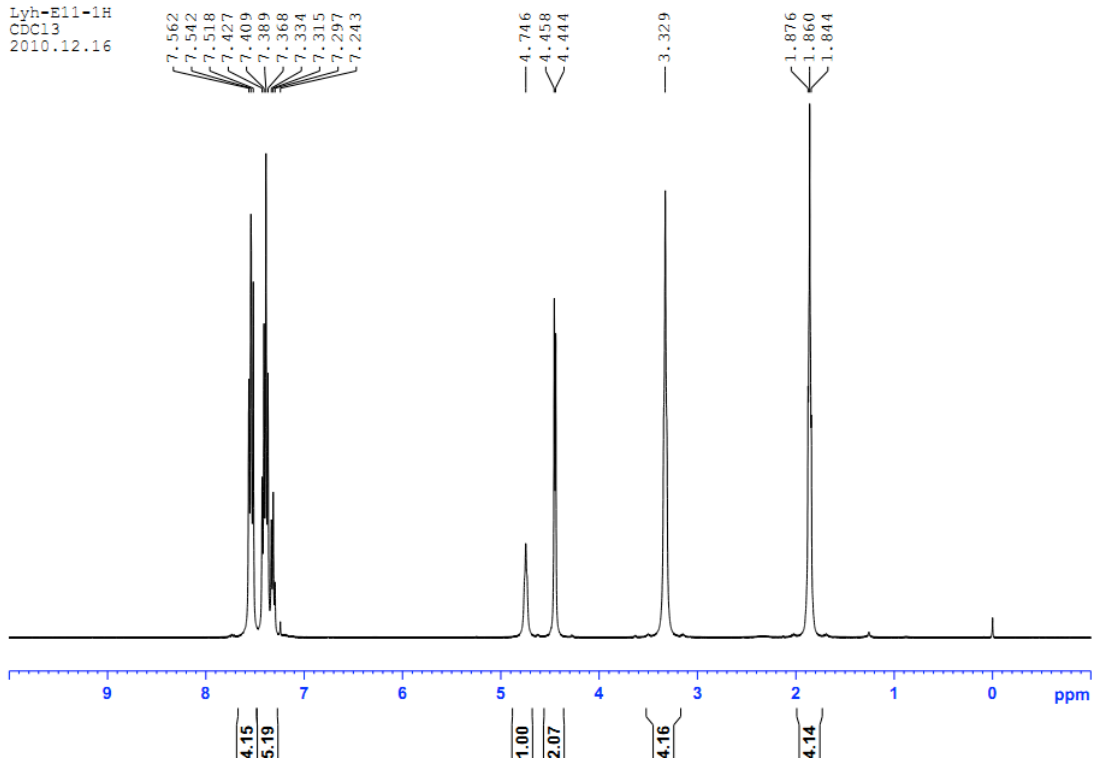

Lyh-E11-13C  
 CDCl<sub>3</sub>  
 2010.12.16

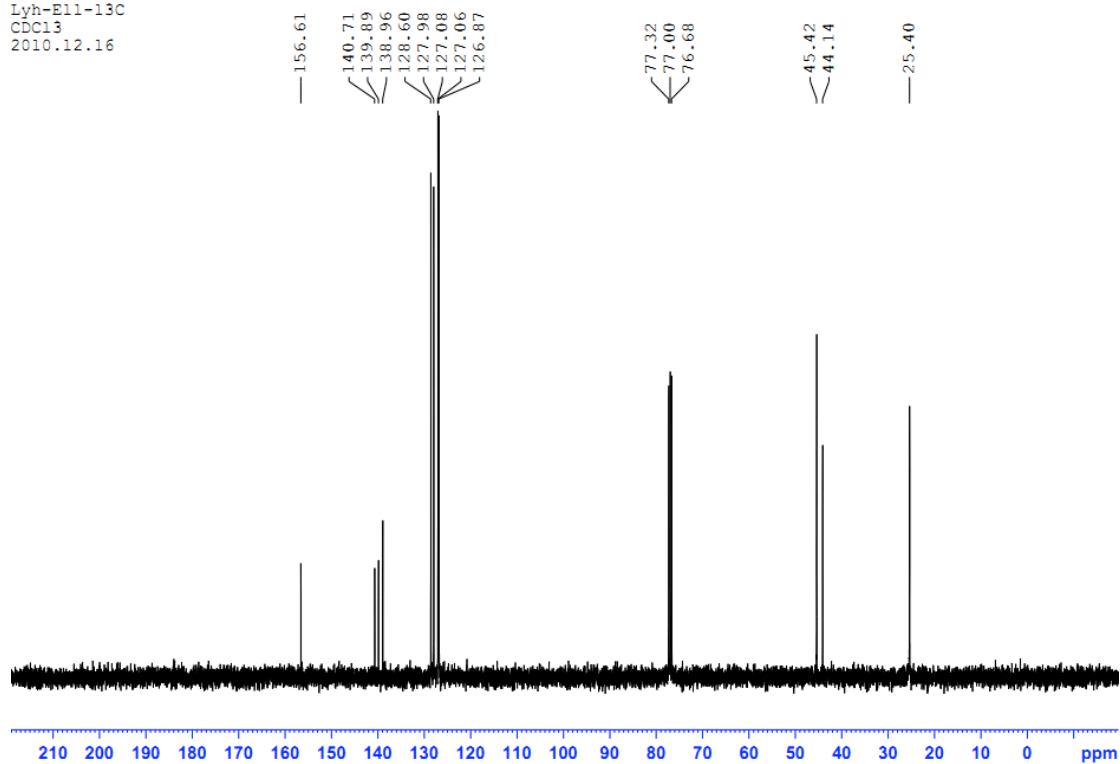

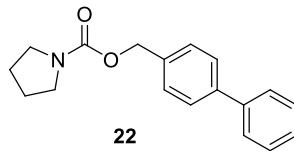

Lyh-E-43-1-1H  
CDCl<sub>3</sub>  
2011.01.23

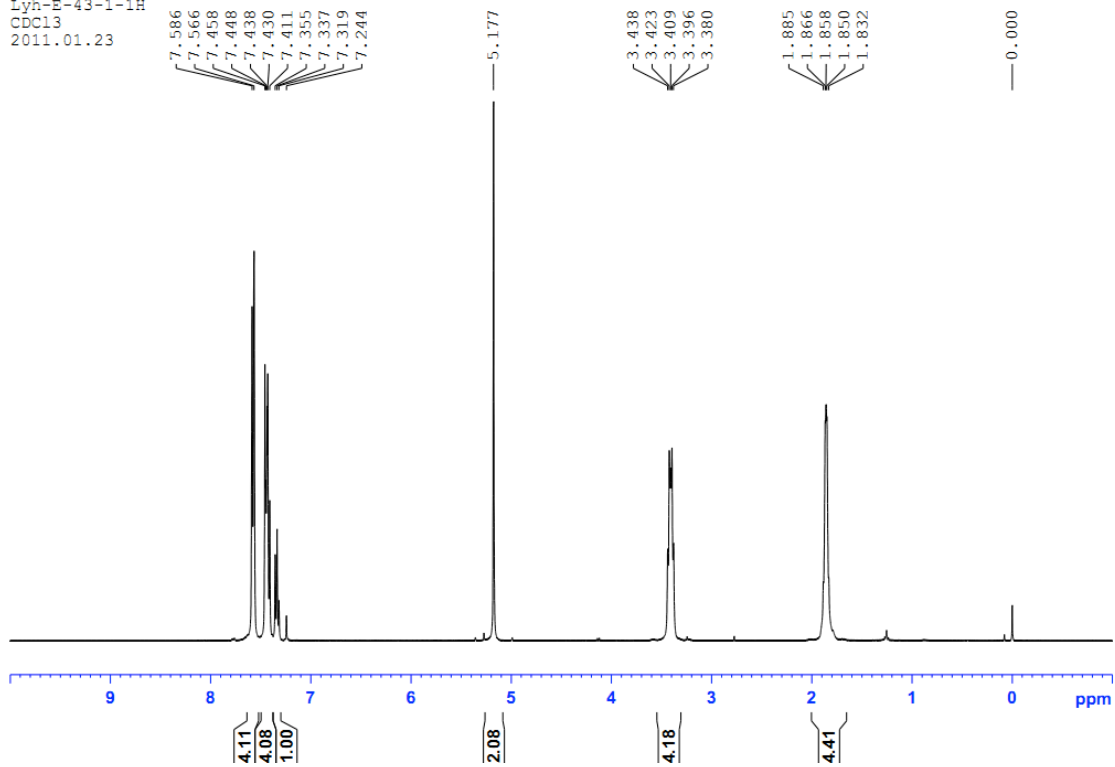

Lyh-E-43-1-13C  
CDCl<sub>3</sub>  
2011.01.23

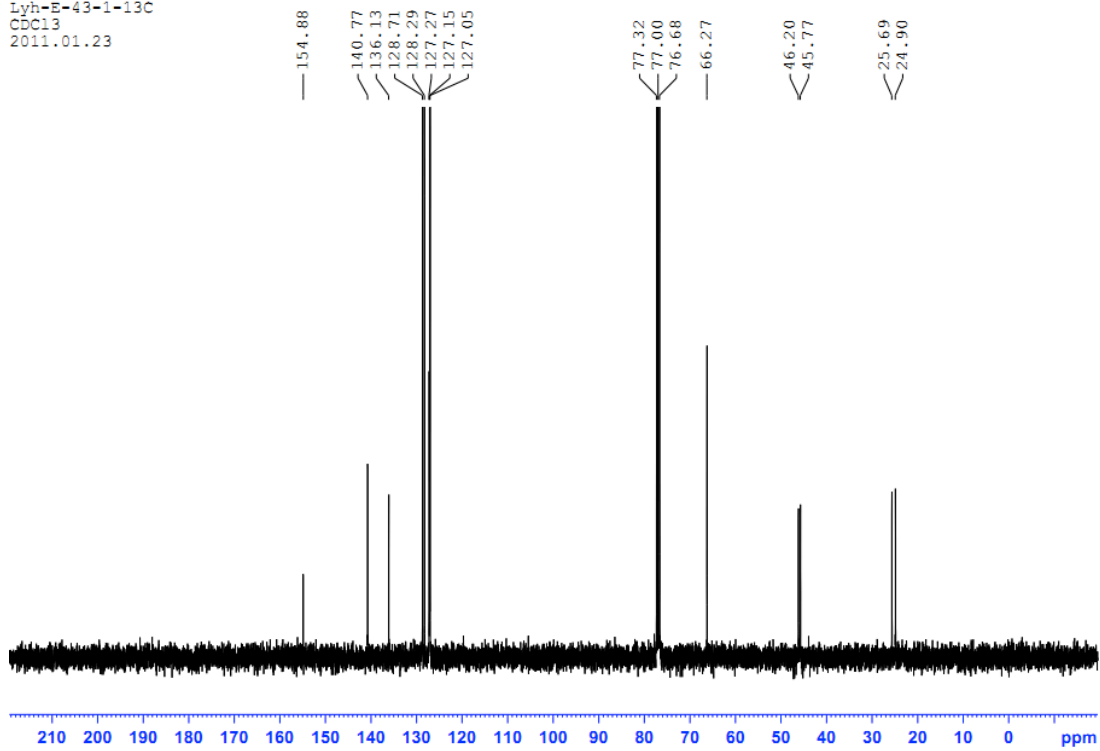

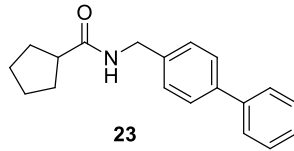

Lyh-E-40-1-1H  
 CDCl<sub>3</sub>  
 2011.01.20

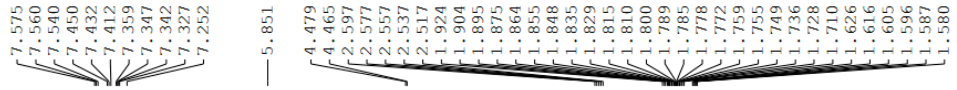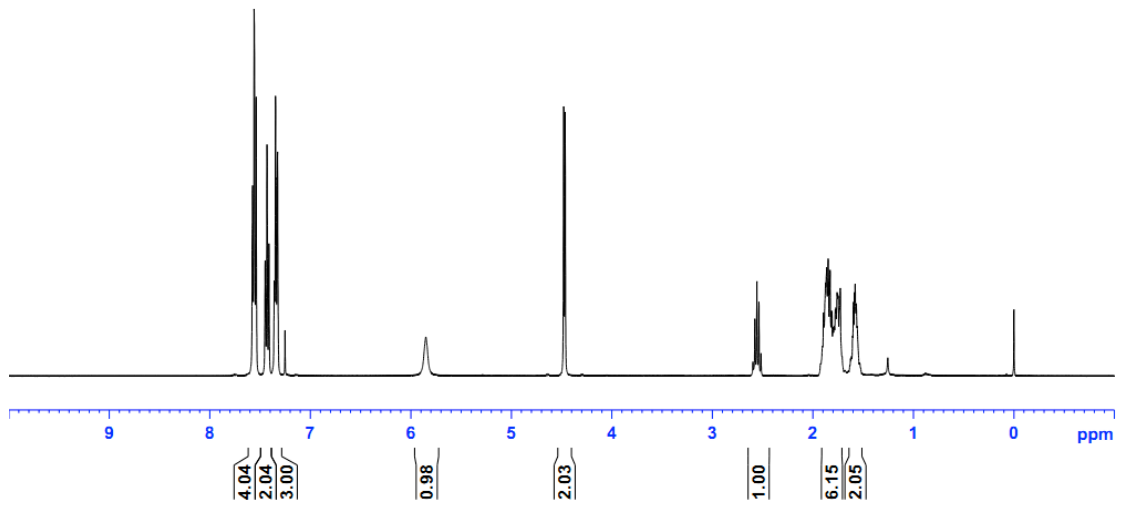

Lyh-E-40-1-13C  
 CDCl<sub>3</sub>  
 2011.01.20

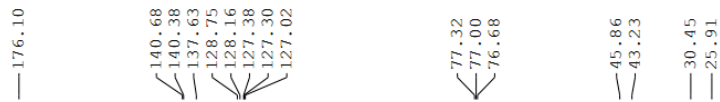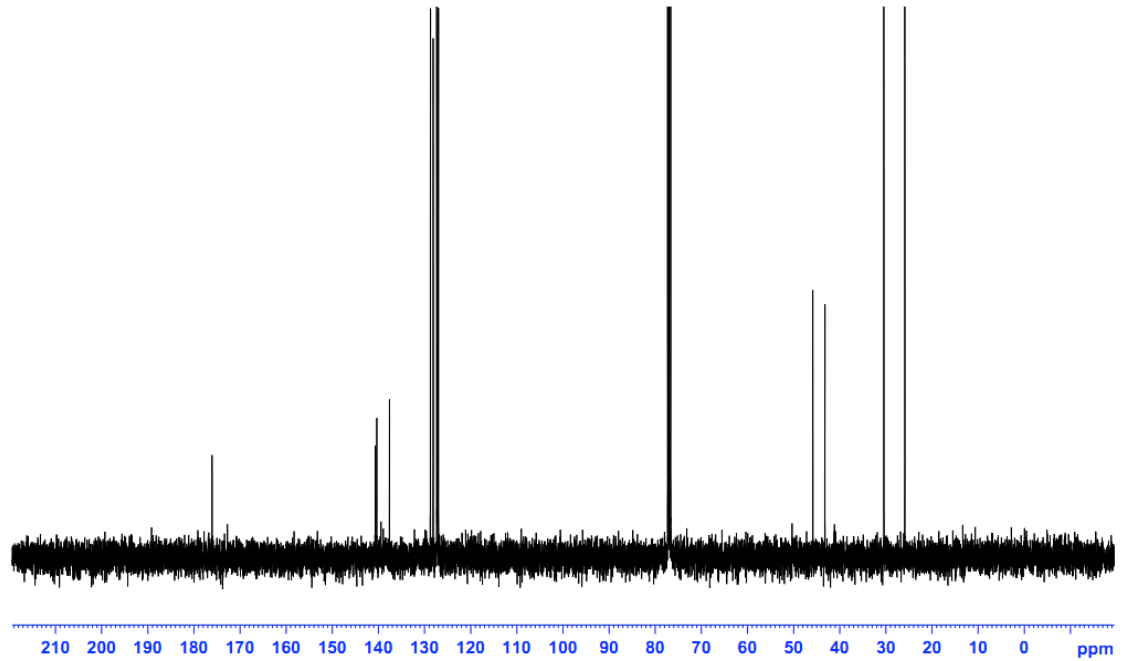

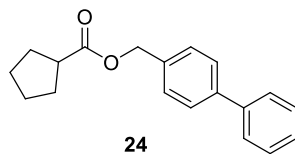

Lyh-E-19-1H  
 CDC13  
 2011.01.20

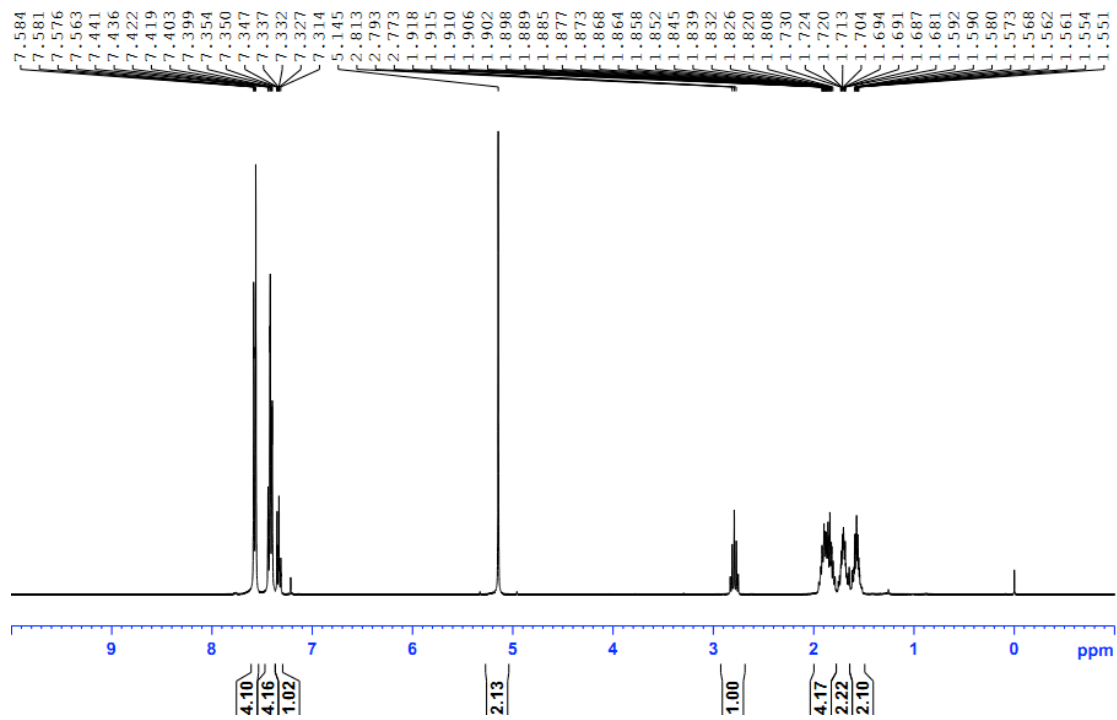

Lyh-E-19-13C  
 CDC13  
 2011.01.20

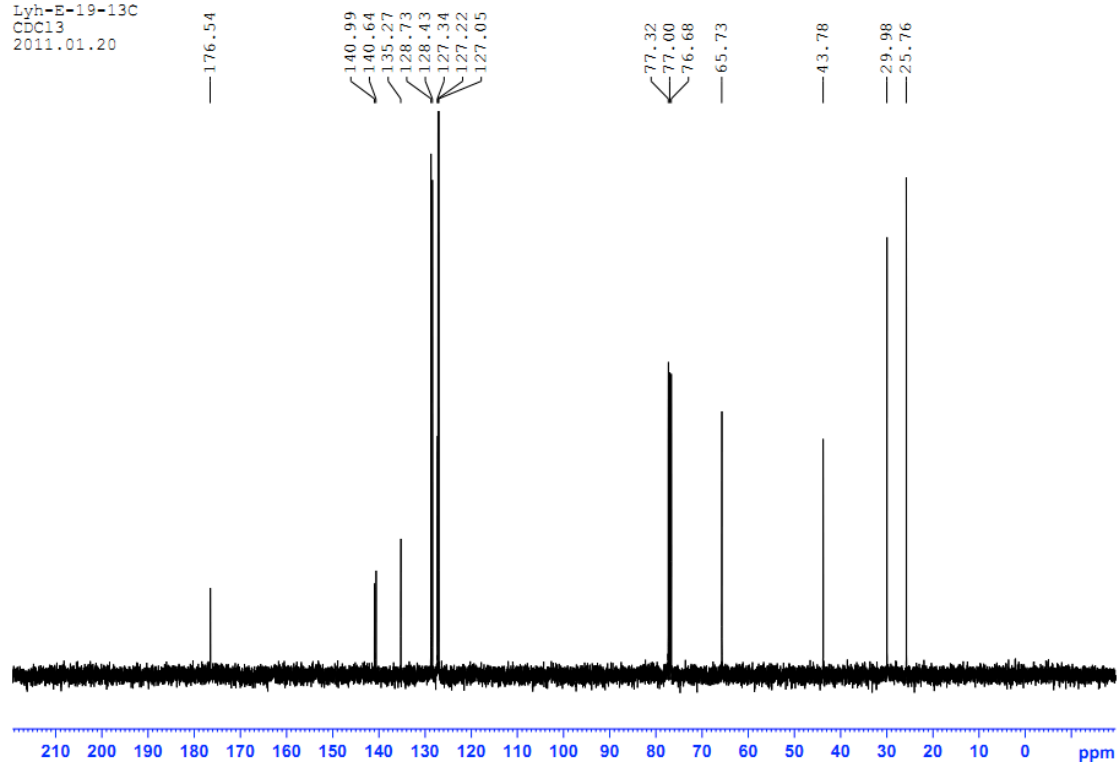

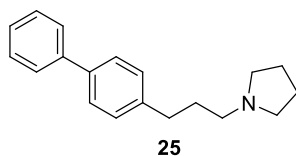

Lyh-E-44-1H  
CD3OD  
2011.02.15

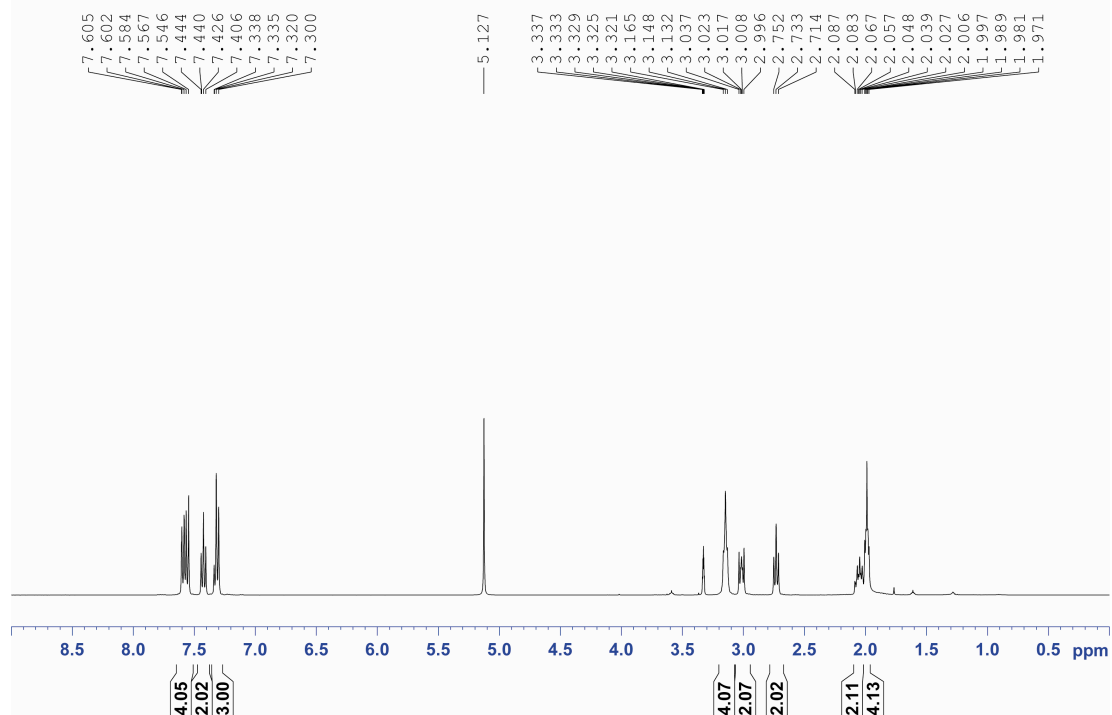

Lyh-E-44-13C  
CD3OD  
2011.02.15

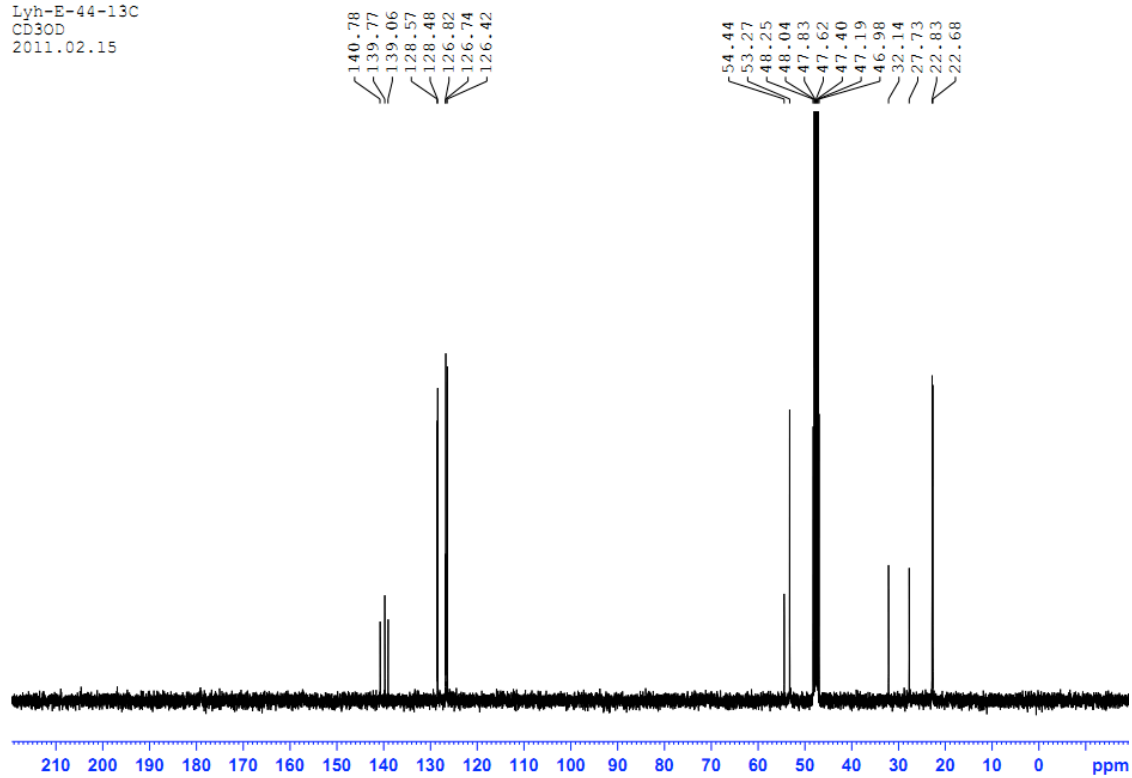

Supplement: pone.0043023.s003.pdf [file pone.0043023.s003.pdf]
