# Supplementary material for: Design and Synthesis of Potent N-Acylethanolamine-hydrolyzing Acid Amidase (NAAA) Inhibitor as Anti-Inflammatory Compounds
Source: PubMed Central journal article supplement (PMC3423427; doi:10.1371/journal.pone.0043023), 2012-08-20

Figure S1

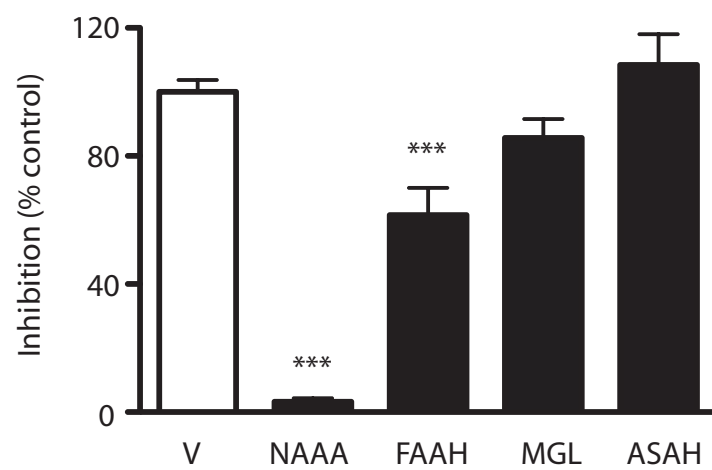

Supplement: pone.0043023.s001.pdf [file pone.0043023.s001.pdf]
